# **Genome scans of diverse dog behaviors implicate a neurodevelopmental gene network in mammalian adaptation and psychopathology**

## **Authors**

Isain Zapata<sup>1</sup>, Erin E. Hecht<sup>2</sup>, James A. Serpell<sup>3</sup>, Carlos E. Alvarez<sup>1,4,5\*</sup>

## **Affiliations**

<sup>1</sup>Department of Veterinary Clinical Sciences, The Ohio State University College of Veterinary medicine, Columbus, OH, 43210, USA.

<sup>2</sup>Department of Human Evolutionary Biology, Harvard University, Cambridge, MA, 02138, USA.

<sup>3</sup>Center for the Interaction of Animals and Society, School of Veterinary Medicine, University of Pennsylvania, Philadelphia, PA, 19104, USA.

<sup>4</sup>Center for Clinical and Translational Research, The Research Institute at Nationwide Children's Hospital, Columbus, OH, 43205, USA.

<sup>5</sup>Department of Pediatrics, The Ohio State University College of Medicine, Columbus, OH, 43210, USA.

\*Corresponding Author: [carlos.alvarez@nationwidechildrens.org](mailto:carlos.alvarez@nationwidechildrens.org)

## Abstract

Genetic studies show a general factor associated with all human personality and psychopathology, but its basis is unknown. We performed genome scans of 17 normal and problem behaviors in three multi-breed dog cohorts. 21 of 90 mapped loci were supported for the same, or a related, trait in a second cohort. Several of those loci were also associated with brain structure differences across breeds; and five of the respective top-candidate genes are also associated with human brain structure and function. More broadly, the geneset of canine behavioral scans is supported by enrichment for genes mapped for human behavior, personality, psychopathology and brain structure. The biology implicated includes, neurogenesis, axon guidance, angiogenesis, brain structure, alternative splicing, disease association, *Hox*-family transcription factors, and subiculum expression. Because dog behavior is correlated with body size, we isolated the effect of body size/height in the dog mapping and in the comparative human UK Biobank analyses. Our dog and human findings are consistent with pleiotropy of diverse brain traits with energy metabolism, height, longevity and reproduction. We propose a genetic network underlies neuron birth and development across the life course, and is associated with evolutionary adaptation of behavior and the general psychopathology factor. This understanding has implications for all common psychiatric disorders, and suggests how their risk could be impacted by environmental effects on the IGF1/growth factor signaling-PI3K-AKT-mTOR axis.

# Introduction

Beginning in 1916 and peaking in the last decade, twin and family studies have revealed a general genetic factor “p” that underlies risk for all human psychopathology<sup>1-3</sup>; and which is strongly correlated with personality<sup>4</sup>. This understanding is consistent with more recent genome wide association studies (GWAS’s) in humans<sup>2</sup> and dogs<sup>5,6</sup>. Human cross-disorder psychiatric GWAS’s showed high levels of polygenicity and genetic-relatedness<sup>7</sup>. 109/146 of those mapped loci (approx. 75%) were pleiotropic for psychiatric traits and were enriched for neurodevelopmental genes<sup>7</sup>. These findings are consistent with cross-trait studies in dogs<sup>5</sup>, and with human GWAS’s of individual traits involving diverse brain functions and structure. However, essentially all variants mapped for human complex traits have minute or small effect sizes. Thus, much of the current focus is on polygenic risk scores, and few individual risk variations have clinical or experimental utility. Biological understanding is more likely to be derived from rare large-effect variations. In contrast to human, canine behavioral pleiotropy manifests in many moderate-to-large effect variations that are common across breeds<sup>5,6</sup>. These present powerful and unique opportunities for biological dissection and medical translation<sup>8,9</sup>.

# Results

## Interbreed genome scanning of behavior, body size and lifespan

Interbreed scanning has two great advantages: i) it allows mapping of variations that are commonly fixed in different breeds, and ii) it has the effect of fine mapping due to the breaking down of linkage disequilibrium (LD) on both sides of functional variations<sup>6,10</sup>. As we and others have done before<sup>5,6</sup>, we performed GWAS’s using breed averages of 17 C-BARQ behavioral phenotypes (Suppl. Table S1; ref. <sup>11</sup>). We also mapped body mass and lifespan (Suppl. Text). We used genotypes from 3,752 dogs total in three cohorts of partially-overlapping breed make-up to conduct separate GWAS’s of each trait in each cohort (29 breeds,  $n=444$ ; 37 breeds,  $n=423$ ; and 50 breeds,  $n=2885$ )<sup>12-14</sup>. Cross-cohort analysis provides

quasi-replication and reduces false positives due to population structure and latent variables. We measured single-marker association for each trait, correcting for population structure within each cohort by using linear mixed models in GEMMA<sup>15</sup>. The inflation factor ( $\lambda$ ) had a narrow range with an average of 1.14, slightly above the 1.05-1.1 considered benign (Suppl. Text). In total, we found associations at 90 loci across all behavioral traits (Fig. 1A; Table 1; Suppl. Data 1, Tables S2-6)<sup>12-14</sup>. Eleven loci were supported for the same or a related trait in at least a second cohort – here or in our previous mapping – or for different behaviors. Ten additional loci were supported by another interbreed GWAS<sup>5</sup>. That quasi-replication mitigates possible type I error, as does the supporting evidence for those loci in our unpublished study of pedigree and mixed breed dogs with individual-level genotype and behavioral phenotype data<sup>16</sup>. The geneset analyses below suggest it is unlikely our mapping has a high false positive rate.

### **Effect direction and amount of variation explained**

To determine effect direction, we built regression models using stepwise selection of loci with significant contributions to the model (Fig. 2A). Eigen decomposition was first used to cluster the markers correlated by linkage into one. Several loci showed the presence of multiple regions with different effects on the variable. This has been reported for morphological and behavioral traits mapped to some of these loci (e.g., chr10 *MSRB3-HGMA2* locus)<sup>6,13</sup>. The loci at chr10, chr15, chr18, chr20 and chrX were among the strongest findings. The directions of the effects are corroborated across the three cohorts (note Boyko appears opposite due to designation of minor allele; e.g., chr15/*IGF1* and body size). Many associations were significant after Bonferroni adjustment.

### **Genetic associations with brain structure**

We performed joint analyses of behavioral loci and published brain imaging data from 62 dogs of both sexes from 33 breeds<sup>17</sup>. Magnetic resonance imaging (MRI) data was normalized for brain volume, and used to measure gray matter differences across breeds and sexes. We tested for association using allele frequencies at our quasi-replicated loci and the factor loading coefficients of each of the six reported independent component (IC) brain networks (Fig. 2B; Suppl. Text). Note IC2, IC3 and IC5 are strongly-significantly associated, while IC1 is marginally associated with total brain volume<sup>17</sup>. We evaluated each association all together for all IC's and all relevant loci in our analysis. Many associations were significant after Bonferroni adjustment. Of those, both IC2 and IC3 were associated with the chr15 and chr18 loci in all three cohorts, these associations reached individual Bonferroni significance. Multiple linear regression estimated all priority loci together account for 56%, 45% and 57% of the variance for IC2 in the three cohorts while they accounted for 66%, 67% and 57% for IC3 in the three cohorts. For IC6, two cohorts showed the variance explained was 60% and 29%. Supporting our findings, five top candidate genes at three of these loci have also been reported to be associated with differences in human brain structure: *MSRB3* and *HMGA2* in the chr10 locus, *FOXP1* and *MITF* in chr20, and *IGF1* in chr15 (Table 1)<sup>18,19</sup>. For the first four of those human alleles, the same studies also showed association with cognitive traits in humans<sup>19</sup>.

### **Trait associations, gene annotation and brain relevance of quasi-replicated loci**

The four loci mapped for fear and aggression traits in multiple cohorts in our prior study (chr10:8.1, chr15, chr18 and chrX:102.1; ref. <sup>6</sup>) were confirmed here and additional trait associations were identified, including brain structure and body size for all four (addressed above and below, respectively). As we previously reported, the gene annotation of those loci shows strong behavioral relevance (Suppl. Text)<sup>6</sup>. The new loci on chromosomes 20 and 24 have strong behavioral candidates (Suppl. Text). Both loci are under strong evolutionary selection, but the coat-pattern alleles presumed to be under selection

cannot be discerned from the present SNP genotype data<sup>20</sup>. Two cohorts had chr20 associations with escaping and owner-directed aggression; and single cohorts had associations with chasing, separation anxiety and separation-related urination. The chr20 locus contains three transcription factor genes: *MITF*, *MDFIC2* and *FOXP1*. The chr24 locus was mapped in two cohorts for nonsocial fear, rivalry aggression and separation anxiety. The genes nearest the peak marker are *RALY*, *EIF2S2*, *ASIP* and *AHCY*. Both *MITF* and *agouti/ASIP* are well known for key roles in external pigmentation, but also have strong evidence of behavioral roles. Although *MITF* is at the same locus as the prominent behavioral gene *FOXP1*, math ability, educational attainment and brain structure traits have been specifically mapped to *MITF* in human GWAS's<sup>19,21,22</sup>. Strikingly, the targeted null-mutation of *Asip* in a wild-derived mouse strain strongly increased tameness and reduced aggression in comparison to the wild type strain<sup>23</sup>. Domesticated strains of several mammalian species are deficient in *Asip* and are tamer than wild type (Suppl. Text)<sup>24-27</sup>. The most famous example is Belyaev's "Russian farm-foxes" which were selected for tameness for 50 generations beginning in 1959. Notably, the initial "silver foxes" tamed were silver- or black-colored Canadian red foxes later found to be null for *Asip*<sup>28</sup>. We found that *ASIP* mRNA is expressed in specific brain regions in humans and cattle, most prominently in the subiculum, subregions of the hippocampus, amygdala and hypothalamus, and cerebellum (Suppl. Text). These and the cited findings suggest *Asip* is one of the most important genes in domestication and the seminal tameness-variant in Belyaev's silver foxes. This presents a major cautionary note given the vast majority of mammalian neuroscience research is conducted in C57BL/6J mice, which are null for *Asip* ("a" in mouse).

The following two quasi-replicated loci are among those with strong biological relevance (Suppl. Fig. S1; Suppl. Text). The haplotype on chr1, which implicates *RCL1*, was previously known to be associated with morphological and reproductive traits<sup>13,14</sup>. Here it was associated with chasing in two cohorts and anxiety traits in single cohorts. Human linkage and association studies showed a missense

mutation in *RCL1* is associated with depression<sup>29</sup>. *ANGPT1* is very near the chr13 peak associated with excitability, nonsocial fear and body size in two cohorts and with dog aggression, separation anxiety, attachment and lifespan in single cohorts. This chr13 region has strong signals of evolutionary selection and interbreed differentiation in many breeds<sup>13</sup>, but the basis for that is unknown. The human *ANGPT1* locus is associated with subjective well-being in Europeans<sup>30</sup>.

### Biological pathway and transcription factor relevance

We identified 127 candidate genes in the 90 loci mapped for any trait. For all geneset analyses, we only used genes with a human protein-coding ortholog (HUGO HGNC<sup>31</sup>). To evaluate the effect of body size, we compared our findings with a similar study that controlled for body weight. MacLean and colleagues mapped breed averages of 14 C-BARQ behaviors included in this work, but designed the association analysis to remove the effect of body weight as a proxy for body size<sup>5</sup>. They used two genotype cohorts, one in common with this work<sup>12</sup>. Our single-marker geneset of 108 and their gene-based mapping geneset of 715 share 19 genes, which makes them significantly overlapping (hypergeometric  $P=6.91 \times 10^{-6}$ ). First, we tested for enrichment in diverse curated categories using Enrichr and DAVID<sup>32,33</sup>. Table 2 is a summary of the pathway and tissue analyses (Suppl. Tables S7-33). Many associations are shared by the two canine behavioral GWA genesets, including the top ranking of the biological pathway axon guidance and the annotation for tissue enrichment of brain. Both were significant for various aspects of embryonic development and morphogenesis. Both were significant and similarly ranked for alternative splicing and disease mutation. Based on genome wide *in situ* hybridization data for mouse brain, the two genesets strongly overlapped for the subiculum and its subregions. Relevance of mouse knockouts of transcription factors turned up the human Rett syndrome gene *MECP2* (methyl-CpG binding protein 2) as significant and ranked first or second in the two genesets. Linking behavior and longevity, two genes implicated in the *Mecp2*-knockout mouse have human psychiatric relevance and were also found within

dog behavioral genes enriched for increasing DNA-methylation with age in humans, mice and dogs (*ST8SIA2* and *TENM4*; Suppl. Text B.4e)<sup>34</sup>.

Approximately 100 transcription factor binding sites were significantly enriched for our geneset (Suppl. Table S25). The top 20 binding sites correspond to 26 transcription factors enriched for developmental processes, including 11 associated with both generation and differentiation of neurons (Table 3). Analysis of our geneset combined with MacLean et al.'s yielded 132 factors predicted by two algorithms to bind at 98% of mapped genes (Suppl. Tables S26, S34). The top factors, beginning with the first, were POU6F1, LHX3, FOXA2, CDC5L, ALX1, PRX2 and MEF2A according to significance; and IRF1, FOXO3, LHX3, FOXD3, FOXF2, POU6F1, FOXA2 according to fold-enrichment. Those are enriched for two classes of developmental transcription factor families: *Fox* and *Hox* ( $n=4$  and  $3$ ;  $P_{Adj}= 1.11 \times 10^{-5}$  and  $0.153$ , respectively; Enrichr). *Fox*-family genes, including *FOXO3* and *FOXA2*, have key roles in growth/IGF1-signaling, longevity and neurogenesis<sup>35</sup>.

## Human GWA relevance

Table 4 summarizes results of the geneset analyses of human genetics. We first tested the compiled set of all GWAS's with  $n > 50,000$  (ref. <sup>36</sup>). The MacLean geneset was enriched for the categories Activities, Environment, Cognition and Reproduction (Psychiatric was suggestive), of which Activities and Environment remained significant after Bonferroni correction (Suppl. Table S35). The small Social Interactions set (379 genes) was omitted from the main analysis, but was suggestive ( $P=7.95 \times 10^{-3}$ ). Our far lower-powered geneset was not significant for any, but had the smallest  $P$  value for the same category as MacLean's and combining the two improved the significance of all positive categories.

We tested the two dog genesets in parallel against three human genetics datasets (Suppl. Tables S27-33). Enrichment testing of the GWAS catalog (NHGRI-EBI) strongly reflected the difference in our study design vs. MacLean et al.'s, who sought to remove the effect of body size (Table 4). The traits that

were significant and top-ranked in both genesets were systolic blood pressure, QRS duration and pulse pressure. Analysis of the UK Biobank human GWAS dataset revealed 79 significant traits for our geneset and 181 for MacLean et al.'s. Both the UK Biobank and dbGAP analyses showed our geneset ranked higher than MacLean's for height-related traits and vice versa for traits related to metabolism and body mass index (BMI). These patterns suggest breed-average weights are good proxies for body size in dogs, and show much of that variation was removed in MacLean et al.'s GWAS's (whereas BMI ranked #1). However, the MacLean geneset contained four of our nine genes/loci quasi-replicated for behavior and associated with body size (*MSRB3*, *ANGPT1*, *IGF2BP2*, *IGSF1*), and had strong signal for height in the UK Biobank GWAS and dbGAP (Bonferroni  $P=1.08 \times 10^{-5}$  and  $P=5.63 \times 10^{-8}$ , respectively).

Both canine behavior GWA genesets were significant for cardiovascular traits in all three human genetics datasets. Both were also significant for several other trait groups in the UK Biobank GWAS dataset: lung function, blood cell counts, skin color, behavior and demographics. Skin color associations are consistent with two of our behavioral loci which contain genes associated with coat color and pattern, but also expressed in the brain (*ASIP* and *MITF*). The brain traits significant in both genesets include some related to depression, demographics likely to be correlated with both socioeconomics and intelligence, and reaction time. Six alcohol, tobacco and drug use traits were significant in MacLean's geneset, but only one of those was nominally significant in ours (see Discussion). Two anxiety traits and neuroticism scores were significant in MacLean's geneset, but not in our much smaller one.

We tested whether the comparative dog-human GWA findings could be largely due to enrichment for body size/height. We asked if top human-GWAS traits associated with both canine genesets were also associated with height. We used the 162 complex-trait Polygenic Risk Scores (PRS) Atlas derived from the UK Biobank GWA data<sup>37</sup> to perform phenome scans in that population (Suppl. Text and Table S35). The traits with top associations with our geneset but not MacLean et al.'s – forced vital capacity and height – were extremely-highly significant for height PRS's (both also for many

anthropometric and diverse brain traits). However, the top traits common to both genesets did not show that pattern: Distance between home and workplace was only significant, with Bonferroni adjustment, for the Years of schooling PRS; in contrast, the Height PRS ranked #72,  $P=0.44$ . Also, pulse wave arterial stiffness index (defined as height divided by systole peak-to-peak time) was significantly, and, by very far, most strongly associated with the PRS of Blood pressure (a known correlation<sup>38</sup>). This suggests the top shared traits are not primarily due to correlation with body size and are associated with intelligence and vascular biology, respectively.

### **Analyses of hypothalamic single-cell expression data from juvenile mice**

Based on data availability and tissue relevance<sup>6</sup>, we queried single cell RNA sequencing (scRNA-seq) data from hypothalamus (detailed in Suppl. Text)<sup>39</sup>. That dataset is based on dissection of a vertical column spanning the rostrocaudal span from preoptic to tuberal areas – but not mammillary – from pooled hypothalami of 2-4 week old mice of both sexes. We focused on the 62 neurons that were defined as clusters of sequences. First we identified the clusters depleted ( $n=3$ ) or enriched ( $n=6$ ) for both our GWA geneset and MacLean et al.'s by applying a 1-SD threshold to equal numbers of differentiation-ranked genes for each cluster (using rank-sum  $P$ ). Hypergeometric testing showed all nine were nominally significant for depletion or enrichment, respectively (Fig. 3B). All three depleted clusters and enriched Cluster 61 were significant with Bonferroni correction. We also tested the nine clusters against datasets of human genes associated with brain traits having approximately 700 or more genes. The traits were neuroticism and wellbeing (weakly powered), educational attainment, alcohol and tobacco use, brain structure and autism. Gene sets were from GWA and gene-based GWA, except for the more speculative autism set based on exome sequencing and network-based predicted genes. We observed a general pattern whereby enriched clusters were strongly enriched for all the human datasets by comparison to the depleted clusters. Clusters 55 and 61 consistently had the strongest effects.

None of the six priority scRNA-seq clusters have been mapped<sup>39</sup>. Five of the six, including #55 and #61, are glutamate neurons. While few of the 62 clusters were reported to be sex-associated, #55 was predominantly male and #61 female<sup>39</sup>. Supporting that, we found that #55 is among the most differentiated clusters for the Y chromosome gene *Ddx3y*, and #61 is the top-most for the X-inactivation gene *Xist* (rank-sum  $P=6.19 \times 10^{-2}$ ,  $P=8.38 \times 10^{-4}$ , respectively). Further studies are necessary to rule out other explanations for these sex effects (e.g., systematic dissection differences by age or sex). To begin to understand the biology of the six priority neurons, we compiled their differential expression of 155 signaling genes (Suppl. Text and Table S36). Among the findings relevant to our dog behavioral mapping and the question of pleiotropy with body size/mass and metabolism, *Igf1*, *Igf1r*, *Igf2r* and *Igfbp5* are differentiating for Cluster 55 (as are *Abcc8* and *Kcnj11*, suggesting it is glucose-sensing), and *Igf1r* is for #61. We next evaluated the most differentiating-genes shared by the six priority clusters compared to the rest of the 62 hypothalamic neuron clusters (Suppl. Text; Table S37). Those include many genes prominent in brain biology: *Spock2*, *Chrna4*, *Gabbr1*, *Kcnc1*, *Nrxn1*, *Celsr2*, *Megf8* and *Rbfox1*. We analyzed the top 18 most differentiated genes shared by the six clusters. 17 of 18 are associated with 374 human traits based on GWA. 12 of 18 are associated with 120 brain traits, most commonly in the area of drug use, followed by psychopathology and intelligence. Of the other six, one is associated with circulating IGF1 levels and the remaining five are highly expressed in the brain. Of the 18 top genes, seven are associated with height and six with BMI – with two overlapping. Four of 18 are associated with longevity (overlap of one each for height and BMI). These findings are consistent with canine behavioral mapping being enriched for a genetic network underlying the “p” factor and pleiotropic for height<sup>40-43</sup>, BMI<sup>43</sup> and longevity<sup>44</sup> in humans.

Transcription factors that significantly differentiate priority clusters (based on rank-sum  $P$ ) supported the predictions based on both dog GWA genesets (Suppl. Text). For example, the top four Table 3 predictions – *Pou6f1*, *Pou2f1/2*, and *Mef2a* – were corroborated in the priority clusters. Out of

the 62 hypothalamic neuron clusters, those four were differentiating in nine, four, seven and six clusters, respectively. Of the six priority clusters, all five glutamatergic clusters (but not GABAergic #17) were supported by at least one of those four transcription factors. Strikingly, all four were differentiating for Cluster 55 (as were the dog behavioral GWA genes *Pou6f2* and *Cux1*). Visual inspection of cluster differentiating genes revealed a neurogenesis and neurodevelopment profile for Cluster 55 (Suppl. Table S38). We tested all clusters for their content of dog behavioral GWA, neurogenesis and angiogenesis genes (Fig. 3A; Suppl. Text). This showed clear correlation between the mouse hypothalamic neuron cluster pattern and their overlap with dog GWA and mammalian neurogenesis genesets. Clusters 46-62 also correlated with angiogenesis. The restriction of *Lef1* and *Grin2b* expression to Clusters 51-62 suggest the implicated clusters are located more caudally, and are more immature and still undergoing synaptogenesis (Suppl. Text).

### **Detection of relevance to neurogenesis in human embryonic neocortex**

Human and dog GWAS's of behavior, cognition and psychopathology implicate diverse brain regions<sup>5-7,22,40,42,45-50</sup>. While our hypothalamic cluster analysis nominated specific cells, parsimony suggests the basis for that is shared according to developmental states or in functionally-related neurons across the brain. We reasoned the most likely implication was neurogenic/neurodevelopmental transcriptional networks and sought to test that using data from a different genomic dimension, brain region and species: open chromatin analysis in the developing neocortex of humans<sup>51</sup>. We found strong relevance of the combined canine GWAS's for transcription factor motifs found in the neural precursor-enriched germinal zone vs. the neuron-enriched cortical plate (Fig. 4). That included transcription factors mapped and motifs predicted by the dog GWAS's, and their paralogs. For example, the most strongly predicted transcription factor based on the dog mapping was POU6F1, which was supported by the mouse hypothalamus scRNA-seq data. It had the second strongest signal for germinal zone enrichment

( $P_{\text{adj}}=2.96 \times 10^{-92}$ ). Two mapped dog genes, *CUX1* and *POU6F2*, were ranked eighth and eleventh, respectively ( $P_{\text{adj}}=3.23 \times 10^{-18}$  and  $5.09 \times 10^{-12}$ ). The top neurogenic transcription factors in that study and those overlapping the dog GWAS's are enriched for the Hox family (incl. POU, CUX and PAX subfamilies). Whereas this neocortical data shows transcription factors associated with embryonic neurogenesis, canine-mapped genes and their enriched motifs also implicate post-natal neurogenesis and neurodevelopment. *Pou6f1* is required for activity-dependent plasticity of adult-born neurons in the olfactory bulb<sup>52</sup>. *Pou3f2* and *Pax6*, which were predicted from the canine GWA geneset, are required for normal adult neurogenesis<sup>53,54</sup>. Among the evidence for neurogenesis networks, *Pax6* regulates the mapped gene *Cux1*, which, in turn regulates the mapped gene *Pou6f2*<sup>55,56</sup>.

### Detection of footprints of evolutionary selection

We analyzed the genesets of the present and weight-corrected GWAS's of dog behavior for relevance to selection (Table 5). Both were enriched for genes under positive selection in humans and domesticated dogs. Relevance of selection in 15 Chinese indigenous dog breeds hints that mapped variants predate breed creation and thus represent standing variation in wolves. Other domesticated animals are difficult to test because selection regions tend to be very large and contain many candidate genes, but the combined dog genesets were nominally significant for 666 candidate genes implicated in at least two of cattle, goats, pigs or sheep. Consistent with each other, both genesets are enriched for loss-of-function intolerant genes in humans<sup>57</sup>, and suggestive of depletion for genes with coding variation under selection in diverse wild and domesticated vertebrate species<sup>58</sup>. Both genesets are depleted for human single-trait associations and enriched for human accelerated-divergence regions<sup>59</sup>. In the preceding section we showed relevance to transcription factor motifs enriched in open chromatin in the germinal zone of developing human neocortex. That open chromatin is also enriched for human-gained enhancers, and their targeted genes are expressed in the progenitor-enriched laminae of the cortex<sup>51</sup>.

These findings suggest evolutionary adaptation of behavior preferentially targets a genetic network of neuron birth and development.

## Discussion

Our canine investigations of behavior, genetics, brain imaging and comparative genomics are core facets of the neurobiology and evolution approach begun by Darwin and now referred to as personality neuroscience<sup>60</sup>. In the Supplementary Text, we discuss the strengths and weaknesses of canine interbreed genome scanning. By mapping across dog breeds in three separate cohorts, we implicated 127 genes at 90 loci for risk of diverse normal and problem behaviors. We mitigated population structure and latent variables in the association analysis by using multiple cohorts with different breed makeup. Many of our findings are quasi-replicated: supported by the same or related traits being mapped in another cohort here or in prior studies<sup>5,6</sup>. While we can't rule out the possibility of some false-positive discovery, the biological relevance of our GWA geneset suggests most loci are likely valid – even those mapped in a single cohort (e.g., incl. behaviorally-relevant genes *SHISA6* and *SMOC2*; Suppl. Text). This work also takes the first step to move canine genetics into the realm of brain physiology. We showed several of the loci presently mapped in multiple cohorts in this study are associated with brain structure differences previously detected across dog breeds<sup>17</sup>. That is supported by geneset enrichment for human GWA genes mapped for differences in brain structure – which includes five priority genes mapped in multiple cohorts here. While geneset analyses ranked parts of the limbic system highest, our brain structure association findings and deeper results of geneset analysis showed diverse other brain regions – including thalamic and cortical – were also significant. In contrast to humans<sup>61</sup>, complex genetic variations of dogs frequently have large effect sizes and thus have direct clinical and experimental utility.

The genetic architecture of canine behavior – and its pleiotropy with body size – is the result of strong positive selection and weak negative selection under domestication. Canine body size is known to be correlated with behavior based on behavioral and genetic evidence<sup>5,6,62-64</sup>. For instance, analysis of 32,000 C-BARQ-phenotyped dogs from 82 breeds showed that behavioral clustering of breeds was explained more by body size than breed relatedness<sup>63</sup>. In humans, height is genetically correlated with brain traits including neuroticism, risk tolerance and smoking cessation<sup>40-42</sup>. In both humans and dogs, body size is also correlated with differences in brain volume and structure<sup>17,65</sup>. The present dog work supports the interpretation that these correlations are due to pleiotropy and not simply population structure (this and the human relevance are discussed in Suppl. Text). That is also supported by the significant overlap of mapped genes and biological relevance between our GWAS's and MacLean et al.'s controlling for body size<sup>5</sup>. For instance, analysis of detailed mouse neuroanatomical data showed both dog genesets were most enriched for the subiculum of the hippocampal formation.

The opposite body-size biases of the two canine behavioral GWA genesets allowed us to stratify associated behaviors and biology (discussed in Suppl. Text). The two dog studies were supported by human UK Biobank GWA relevance, and our phenome analyses allowed us to isolate height effects and show the top traits shared with both dog GWAS's were unlikely to be due to genetic correlation with body size. One UK Biobank trait only associated with our geneset uncorrected for body size was household income, which is known to be associated with both genetics of intelligence and the impact of height on others that affects socioeconomic status<sup>66</sup>. In contrast, the geneset correcting for body size is exclusively associated with tobacco and alcohol use traits, and that is supported by neuroanatomical enrichment. While both genesets are associated most strongly and consistently with the subiculum, ours weakly favors ventral aspects and the body size-controlled geneset predominantly implicates dorsal. The next-most implicated areas are hypothalamus and amygdala in ours (ranked far lower in the other) and striatum in the size-controlled geneset. This suggests both genesets are associated with defense from

threatening conspecifics and predators, but that signal is dramatically demoted when body-mass is controlled for. Only the latter geneset was significant for tobacco and alcohol traits, consistent with reward functions in the striatum. These findings hint that canine body-size genetics is enriched for fear and defense biology. If so, that would suggest possible links to a core anatomy of emotions in the limbic system (e.g., the Papez circuit). It is also possible other regions have similar effects, but rank lower due to a reduced density of relevant cells.

We also found associations with reproduction. Only the geneset uncorrected for body mass was enriched for uterus expression. This is consistent with the strong association of cattle stature with height genetics and uterus gene expression in humans<sup>67</sup>, and with the bidirectional association of endometriosis and diverse psychiatric traits in women<sup>68</sup>. Body and litter sizes are strongly correlated in wolves and dogs, hinting the same genetic network could be involved in determining body, uterus and brain sizes and functions<sup>69,70</sup>. Mendelian Randomization studies in humans show causal relationships between neurobiological and puberty traits, and BMI<sup>71,72</sup>. Consistent with that, the higher-powered geneset of canine behavioral GWA corrected for body mass showed enrichment for puberty traits and BMI. In humans and wolves/dogs, reproductive traits are also correlated with both external pigmentation and longevity<sup>69,70,73</sup>. Body-wide analysis of gene expression for age of menarche GWA in humans was only significant for five brain tissues, three of which were prioritized in this work: anterior cingulate, hypothalamus and pituitary<sup>72</sup>. That study implicated 16 transcription factors. Of those, three were mapped for dog behavior (*ELF1*, *NR2C2*, *MSX1*) or a close paralog was (human *NR2F1* and *SMAD3* implicated; dog *NR2F2* and *SMAD2/4* mapped); and two were significantly enriched in binding site predictions for both canine genesets (*GATA*, *MSX1*).

In addition to human genetics, the canine behavioral GWAS's with and without control for body size were similarly supported by diverse geneset analyses (Suppl. Text). Both were most strongly enriched for the biological pathways axon guidance and morphogenesis, and gene annotation for

alternative splicing and disease mutation. Analyses of evolutionary and genetic demographics show, or for some suggest, enrichment of genes that are pleiotropic, loss of function-intolerant, and under positive selection – including in humans. More specifically, there is also enrichment for human regions of highly accelerated evolution and containing human-specific enhancers that are active in neural progenitors. The main implication of our analyses of dog GWA genes for both scRNA-seq data from juvenile mouse hypothalamus and for open chromatin data from embryonic human neocortex is the relevance of neurogenesis. The scRNA-seq also shows relevance for angiogenesis, consistent with its intimate association with neurogenesis<sup>74</sup>.

Our scRNA-seq findings are supported by studies that used human GWA genesets from diverse traits to identify relevant cells in scRNA-seq data<sup>75</sup>. For instance, educational attainment and schizophrenia showed a Spearman rank correlation of cell-type association of 0.94 because both were enriched for telencephalon projecting excitatory neurons out of the 39 cell types queried, and both associations were enriched for neurogenesis and synaptic processes genes. Other analyses in that work showed relevance of both excitatory and inhibitory neurons for those traits as well as bipolar disorder and BMI, whereas neural progenitors and neuroblasts were prioritized for intracranial volume (shown there to be associated with height) and depression, respectively. Those findings seem to stratify our enrichment analyses, which implicate the broadest definition of neurogenesis from neural stem cells to maturing neurons. In agreement with us, those investigators stated the shared biology of psychiatric and cognitive traits is consistent with a general psychopathology factor. However, they concluded this effect – and other neuron-type associations such as with BMI – is probably mediated at the level of shared cell types rather than genesets. We propose a more parsimonious interpretation (explained in Suppl. Text) is consistent with a heritable psychopathology factor<sup>76,77</sup>: that risk genes and their networks overlap across functional and structural brain traits. While this network is strongly associated with height, BMI and lifespan in dogs, the large effect sizes are presumably the result of body size selection under

domestication. Further studies are necessary to assess that in other animals and in human self-domestication.

In conclusion, genome scans of dog behavior implicate genes associated with human behavioral, cognitive and psychopathological traits. Both dog and human GWAS's consistently and strongly implicate neurogenesis and neurodevelopment at, or near, the top of enriched biological pathways<sup>5-7,22,40,42,45-50</sup>. We propose that evolutionary adaptation of behavior in mammals, and possibly vertebrates, preferentially targets a genetic network for neurogenesis and neurodevelopment throughout the life course. This could at least partially explain the molecular basis of a general genetic factor for human personality and psychopathology. Our findings suggest the “p” factor is integrated with body size, BMI/metabolism, longevity and reproduction. Accepting survival and reproduction are the overarching priorities of natural selection, we believe the core evolutionary biology in play here is the balance of energy metabolism<sup>78</sup> and growth/development (Suppl. Text). In addition to several highly implicated transcription factors (incl. Fox and Hox subfamily members, NR2C2/F2, SMAD2/4 and MEF2A), there is much supporting evidence to nominate mTOR and its regulation by the ancient LIN28/let-7 loop as a core mechanism of that pleiotropy (incl. growth factor signaling-PI3K-AKT upstream; Suppl. Text B.10). It is clear that connected and opposing traits must be balanced, and not difficult to imagine how tradeoffs could impact risks of psychiatric traits. While evolutionary selection, and neurogenesis and neurodevelopment have long been known or suggested to be associated with psychiatric disorders, we believe our integrated proposal to explain the “p” factor is novel (e.g., see review of genetics<sup>2</sup> and discussion of theories<sup>77</sup>). The cross-species conservation revealed here suggests how genomics, neurophysiology and behavior can provide a scaffold for top-down descriptive and dimensional approaches to understanding the mind<sup>79</sup>.

## Methods

**SNP datasets and phenotype data:** Three previously published SNP datasets were used in this study.

Since the breed average phenotype data was not available for all the breeds included in each of the datasets, only those for which phenotypes were available were kept. The Boyko et al. dataset contained 423 subjects from 37 breeds genotyped for ~45,000 SNPs (Affymetrix v.2 Canine array)<sup>14</sup>. The Vaysse et al. dataset contained 444 subjects from 29 dog breeds genotyped for ~175,000 SNPs (Illumina CanineHD array)<sup>13</sup>. The Hayward et al. dataset contained 2885 subjects from 50 dog breeds genotyped for ~160,000 SNPs (custom Illumina Canine HD array)<sup>12</sup>. Datasets were considered as independent, although the Vaysse dataset and the Hayward dataset used in this study share 192 subjects.

For the behavioral phenotype data, we used previously published C-BARQ data<sup>6,80</sup>. This data includes scores for the following problematic behaviors: stranger directed aggression, dog directed aggression, owner directed aggression, dog rivalry, stranger oriented fear, dog oriented fear, nonsocial fear, touch sensitivity, separation-related anxiety, attachment and attention seeking, predatory chasing, excitability, energy, trainability, persistent barking, urination when left alone and escaping/roaming. For the additional traits of size and lifespan we used data compiled from several sources<sup>13,14</sup>, the database curated by Dr. Kelly Cassidy at Washington State University available at <http://users.pullman.com/lostriver/longhome.htm> and from breed specifications published by the American Kennel Club (AKC) <http://www.akc.org/>.

**Genome Wide Association Analysis and gene annotation:** Preparation of datasets, calculation of allele frequencies for each cohort, and removal of subjects with missing phenotypes were carried out in PLINK v.1.07(ref. <sup>81</sup>). To maximize reproducibility across different SNP platforms, no dataset trimming or LD clustering were performed on the SNP data. Association analysis were performed with GEMMA v.0.94.1 (ref. <sup>15</sup>). Population structure was removed by using the centered relatedness matrix correction. Association tests were performed using the univariate linear mixed model using the likelihood ratio test. Genome wide significance was based on Bonferroni adjusted *P*-value thresholds rounded down to the

lowest order of magnitude: Vaysse dataset,  $1 \times 10^{-7}$ ; Boyko dataset,  $1 \times 10^{-5}$ ; Hayward dataset,  $1 \times 10^{-7}$ .

The genomic inflation factor  $\lambda$  was calculated as the median  $\chi^2$  (1 degree of freedom) association statistic observed across SNPs divided by the expected median under the null distribution<sup>82</sup>. Manhattan plots were generated with SAS v.9.4 from GEMMA outputs. Genome-wide significant hits were mapped on the CanFam3.1 genome assembly, UCSC Genome Browser<sup>83</sup>. Gene annotation was evaluated using the Broad Institute improved annotation V.1 track hub<sup>84</sup> and human assemblies hg19/39.

**Effect direction and variance contribution regression modelling:** To estimate effect direction and to determine the amount of variability that could be attributed to each relevant loci, we performed a regression modeling using a stepwise selection method. Since all hits detected were included, we performed a clustering step using Eigen decomposition on the first two dimensions. This decomposition allowed us to select single markers to represent a cluster and remove all the correlated markers that would have caused collinearity issues in the model. Each cohort was evaluated independently. All this analyzes were performed on SAS v.9.4.

**Brain-structure genetic associations:** T2-weighted magnetic resonance imaging (MRI) morphometry data was derived from combined transversely- and sagittally-acquired images (using a 3.0 T MRI unit)<sup>17</sup>. Gray matter differences across breeds and sexes were measured as the degree of warping of per-subject maps to align with group-specific templates normalized by total brain volume (which was strongly correlated with body size). Independent Component (IC) analysis was performed using multivariate, source-based morphometry (GIFT software package for MATLAB<sup>85</sup>)<sup>17</sup>. IC loadings for each individual were evaluated though regression modelling using a stepwise selection method against the same relevant loci list used to detect effect direction and variance contribution. Regression modeling was performed on SAS v.9.4.

**Hypergeometric *P* value calculation:** Of the 19,320 official protein coding genes in humans<sup>31</sup>, we found 16,080 to have a mouse ortholog. We arbitrarily used 80% of the latter number – 12,864 – as a

conservative estimate of the number of genes likely to be expressed in the brain or to be represented across different mammalian species and types of datasets used here. Calculations were performed on SAS v.9.4.

**Geneset enrichment analyses:** Geneset enrichment analyses were performed with Bonferroni multiple testing corrections on the Enrichr and DAVID algorithm and data servers<sup>32,33</sup>. Custom datasets were created for some enrichment analyses as follows. The hypothalamic scRNA-seq dataset was comprised of the top 2,000 genes, according to rank-sup  $P$  value, for each of the 62 neuron clusters reported<sup>39</sup>. Human genetics and evolutionary selection/genomic demographic genesets in Figure 3B and Table 5 are provided with sources in Supplementary Tables S39, S40. Hypergeometric testing (previous section) was used to calculate  $P$  values for those, and Bonferroni multiple testing thresholds were provided.

## Acknowledgements

We thank Marc Kent for providing opportunistically-collected brain imaging data from dogs, as described in ref. <sup>17</sup>. This work was made possible by high quality and publically available canine data. For that we thank the groups led by Adam Boyko<sup>12,14</sup> and Evan MacLean and Noah Snyder-Macklerand<sup>5</sup>, and the consortium led by Matthew Webster<sup>5,13</sup>. We thank the dog owners who contributed with biological samples and those who contributed to the C-BARQ database of behavioral phenotypes. We thank Dr. Kim McBride for his technical advice for designing this study. We thank the Stanton Foundation (Cambridge, MA) and Elisabeth Allison for their support.

## Competing Interests

The authors declare that they have no competing interests.

## Authors Contributions

C.E.A. and I.Z. designed the study. I.Z. led the design of, and executed, the canine genetic analyses. C.E.A. led the design of, and performed, the comparative genetics and bioinformatics analyses, and the biological interpretations. J.A.S. collected and processed the C-BARQ data, and provided the behavioral expertise and, and E.E.H. collected and processed the brain imaging data, and provided that expertise. All authors contributed to the interpretation of results. C.E.A. drafted the manuscript with major contributions from I.Z., and participation from J.A.S. and E.E.H. All authors approved the final manuscript version.

## Figure legends

**Figure 1. Canine behavioral mapping. (A)** Summary of behavioral quantitative trait loci quasi-replicated in independent cohorts in this work. All loci were significant after Bonferroni adjustment. Only positive

chromosomes are shown for each cohort: Vaysse et al. in orange, Boyko et al. in blue and Hayward et al. in green<sup>12-14</sup>. Genome coordinates are from CanFam3.1. **(B)** Mapped intervals and gene annotation for select quasi-replicated loci.

**Figure 2. Effect directions and variance contributions.** **(A)** Effect directions and variance contributions of relevant loci to behavioral traits estimated by linear regression. **(B)** Effect directions and variance contributions of relevant loci to Independent Component brain networks estimated by linear regression. Each relevant locus represents a compiled group of individual SNPs that are correlated grouped through Eigen decomposition of markers correlated by linkage. Cohorts correspond to Vaysse et al., Boyko et al. and Hayward et al., respectively<sup>12-14</sup>. Only significant associations are shown. Percentages correspond to  $R^2$  values while total indicate the overall model  $R^2$ . Positive associations are indicated by a blue gradient while negative associations are indicated by a red gradient. Boxed and bolded values are Bonferroni significant for the cohort.

**Figure 3. Relevance to specific neurons in the mouse hypothalamus and human neurogenetics.** **(A)** Analysis of the canine behavioral GWA geneset vs. 62 neuron scRNA-seq clusters from mouse hypothalamus<sup>39</sup>, and GO genesets for neurogenesis and angiogenesis. The labeled cluster image was taken directly from Romanov et al. 2017 (ref. <sup>39</sup>) and adapted. Yellow and black arrow heads mark the clusters depleted and enriched by 1SD from the mean in both the present and MacLean et al.'s (gene-based GWA corrected body mass)<sup>5</sup> canine behavioral scans. Blue signifies depletion and red enrichment, and the number of asterisks corresponds to one or two SD from the mean for the combined canine geneset. **(B)** The marked depleted and enriched clusters in "A" were compared to the combined canine geneset and several brain-related genesets from human genetics. Note  $P$  and  $Q$  values are hypergeometric probabilities for depletion and enrichment, respectively; bold denotes significant with

Bonferroni correction ( $P < 8.47 \times 10^{-4}$  threshold for 59 tests). Blue signifies depletion, red enrichment.

Human datasets are provided in Supplementary Tables S39/40.

**Figure 4. Relevance to neurogenesis in human embryonic neocortex.** The combined canine behavioral GWA geneset from this study and MacLean et al.'s (gene-based GWA corrected body mass)<sup>5</sup> was used to compare enriched transcription factor binding motifs (labeled on the right) to those enriched in developing neocortex germinal zone vs. cortical plate (labeled on the left). The figure was adapted from de la Torre-Ubieta et al.<sup>51</sup>.

# References

1. Krueger, R.F. *et al.* Progress in achieving quantitative classification of psychopathology. *World Psychiatry* **17**, 282-293 (2018).
2. Smoller, J.W. *et al.* Psychiatric genetics and the structure of psychopathology. *Mol Psychiatry* **24**, 409-420 (2019).
3. Lahey, B.B. *et al.* Is there a general factor of prevalent psychopathology during adulthood? *J Abnorm Psychol* **121**, 971-7 (2012).
4. Oltmanns, J.R., Smith, G.T., Oltmanns, T.F. & Widiger, T.A. General Factors of Psychopathology, Personality, and Personality Disorder: Across Domain Comparisons. *Clin Psychol Sci* **6**, 581-589 (2018).
5. MacLean, E.L., Snyder-Mackler, N., vonHoldt, B.M. & Serpell, J.A. Highly heritable and functionally relevant breed differences in dog behaviour. *Proc Roy Soc Biol Sci* **286**, 20190716 (2019).
6. Zapata, I., Serpell, J.A. & Alvarez, C.E. Genetic mapping of canine fear and aggression. *BMC Genomics* **17**, 572 (2016).
7. Cross-Disorder Group of the Psychiatric Genomics Consortium. Electronic address, p.m.h.e. & Cross-Disorder Group of the Psychiatric Genomics, C. Genomic Relationships, Novel Loci, and Pleiotropic Mechanisms across Eight Psychiatric Disorders. *Cell* **179**, 1469-1482 e11 (2019).
8. Fenger, J.M., Rowell, J. L., Zapata, I., Kisseberth, W. C., London, C. A., Alvarez, C. E. Dog models of naturally occurring cancer. in *Animal Models for Human Cancer*, Vol. 69 (ed. Martic-Kehl, M.I., Mannhold, R., Kubinyi, H., Folkers, G.) 153-221 (Wiley-VCH Verlag GmbH & Co. KGaA, Weinheim, Germany, 2016).
9. Ostrander, E.A., Wayne, R.K., Freedman, A.H. & Davis, B.W. Demographic history, selection and functional diversity of the canine genome. *Nat Rev Genet* **18**, 705-720 (2017).
10. Jones, P. *et al.* Single-Nucleotide-Polymorphism-Based Association Mapping of Dog Stereotypes. *Genetics* **179**, 1033-1044 (2008).
11. Serpell, J.A. & Duffy, D.L. Dog breeds and their behavior. in *Domestic dog cognition and behavior* 31-57 (Springer, 2014).
12. Hayward, J.J. *et al.* Complex disease and phenotype mapping in the domestic dog. *Nat Commun* **7**, 10460 (2016).
13. Vaysse, A. *et al.* Identification of Genomic Regions Associated with Phenotypic Variation between Dog Breeds using Selection Mapping. *PLoS Genet* **7**, e1002316 (2011).
14. Boyko, A.R. *et al.* A Simple Genetic Architecture Underlies Morphological Variation in Dogs. *PLoS Biol* **8**, e1000451 (2010).
15. Zhou, X. & Stephens, M. Genome-wide efficient mixed-model analysis for association studies. *Nat Genet* **44**, 821-824 (2012).
16. Zapata, I., Lilly, M.L., Herron, M.E., Serpell, J.A. & Alvarez, C.E. Genetic testing of dogs predicts problem behaviors in clinical and nonclinical samples. *Preprint (to be submitted to public server in July 2020)* (2020).
17. Hecht, E.E. *et al.* Significant Neuroanatomical Variation Among Domestic Dog Breeds. *J Neurosci* **39**, 7748-7758 (2019).
18. Satizabal, C.L. *et al.* Genetic architecture of subcortical brain structures in 38,851 individuals. *Nat Genet* (2019).
19. Zhao, B. *et al.* Genome-wide association analysis of 19,629 individuals identifies variants influencing regional brain volumes and refines their genetic co-architecture with cognitive and mental health traits. *Nat Genet* **51**, 1637-1644 (2019).

20. Dreger, D.L. *et al.* Atypical Genotypes for Canine Agouti Signaling Protein Suggest Novel Chromosomal Rearrangement. *Genes (Basel)* **11**(2020).
21. Kichaev, G. *et al.* Leveraging Polygenic Functional Enrichment to Improve GWAS Power. *Am J Hum Genet* **104**, 65-75 (2019).
22. Lee, J.J. *et al.* Gene discovery and polygenic prediction from a genome-wide association study of educational attainment in 1.1 million individuals. *Nat Genet* **50**, 1112-1121 (2018).
23. Hirose, M. *et al.* CRISPR/Cas9-mediated genome editing in wild-derived mice: generation of tamed wild-derived strains by mutation of the *a* (nonagouti) gene. *Sci Rep* **7**, 42476 (2017).
24. Albert, F.W. *et al.* Genetic architecture of tameness in a rat model of animal domestication. *Genetics* **182**, 541-54 (2009).
25. Carola, V. *et al.* Modulation of social behavior by the agouti pigmentation gene. *Front Behav Neurosci* **8**, 259 (2014).
26. Hayssen, V. Effects of the nonagouti coat-color allele on behavior of deer mice (*Peromyscus maniculatus*): a comparison with Norway rats (*Rattus norvegicus*). *J Comp Psychol* **111**, 419-23 (1997).
27. Price, E.O. *Animal domestication and behavior*, (Cabi, 2002).
28. Vage, D.I. *et al.* A non-epistatic interaction of agouti and extension in the fox, *Vulpes vulpes*. *Nat Genet* **15**, 311-5 (1997).
29. Amin, N. *et al.* A rare missense variant in RCL1 segregates with depression in extended families. *Mol Psychiatry* **23**, 1120-1126 (2018).
30. Okbay, A. *et al.* Genetic variants associated with subjective well-being, depressive symptoms, and neuroticism identified through genome-wide analyses. *Nat Genet* **48**, 624-33 (2016).
31. Braschi, B. *et al.* Genenames.org: the HGNC and VGNC resources in 2019. *Nucleic Acids Res* **47**, D786-D792 (2019).
32. Kuleshov, M.V. *et al.* Enrichr: a comprehensive gene set enrichment analysis web server 2016 update. *Nucleic Acids Res* **44**, W90-7 (2016).
33. Huang da, W., Sherman, B.T. & Lempicki, R.A. Systematic and integrative analysis of large gene lists using DAVID bioinformatics resources. *Nat Protoc* **4**, 44-57 (2009).
34. Wang, T. *et al.* Quantitative Translation of Dog-to-Human Aging by Conserved Remodeling of the DNA Methylome. *Cell Syst* (2020).
35. Genin, E.C., Caron, N., Vandenbosch, R., Nguyen, L. & Malgrange, B. Concise review: forkhead pathway in the control of adult neurogenesis. *Stem Cells* **32**, 1398-407 (2014).
36. Watanabe, K. *et al.* A global overview of pleiotropy and genetic architecture in complex traits. *Nat Genet* **51**, 1339-1348 (2019).
37. Richardson, T.G., Harrison, S., Hemani, G. & Davey Smith, G. An atlas of polygenic risk score associations to highlight putative causal relationships across the human phenome. *Elife* **8**(2019).
38. Sayed-Tabatabaei, F.A. *et al.* Heritability of the function and structure of the arterial wall: findings of the Erasmus Rucphen Family (ERF) study. *Stroke* **36**, 2351-6 (2005).
39. Romanov, R.A. *et al.* Molecular interrogation of hypothalamic organization reveals distinct dopamine neuronal subtypes. *Nat Neurosci* **20**, 176-188 (2017).
40. Nagel, M. *et al.* Meta-analysis of genome-wide association studies for neuroticism in 449,484 individuals identifies novel genetic loci and pathways. *Nat Genet* **50**, 920-927 (2018).
41. Karlsson Linnér, R. *et al.* Genome-wide association analyses of risk tolerance and risky behaviors in over 1 million individuals identify hundreds of loci and shared genetic influences. *Nature Genetics* (2019).
42. Liu, M. *et al.* Association studies of up to 1.2 million individuals yield new insights into the genetic etiology of tobacco and alcohol use. *Nat Genet* (2019).

43. Speed, M.S., Jepsen, O.H., Borglum, A.D., Speed, D. & Ostergaard, S.D. Investigating the association between body fat and depression via Mendelian randomization. *Transl Psychiatry* **9**, 184 (2019).
44. Marioni, R.E. *et al.* Genetic variants linked to education predict longevity. *Proc Natl Acad Sci U S A* **113**, 13366-13371 (2016).
45. Apple, D.M., Fonseca, R.S. & Kokovay, E. The role of adult neurogenesis in psychiatric and cognitive disorders. *Brain Res* **1655**, 270-276 (2017).
46. Luciano, M. *et al.* Association analysis in over 329,000 individuals identifies 116 independent variants influencing neuroticism. *Nat Genet* **50**, 6-11 (2018).
47. Turley, P. *et al.* Multi-trait analysis of genome-wide association summary statistics using MTAG. *Nat Genet* **50**, 229-237 (2018).
48. Savage, J.E. *et al.* Genome-wide association meta-analysis in 269,867 individuals identifies new genetic and functional links to intelligence. *Nat Genet* **50**, 912-919 (2018).
49. Hill, W.D. *et al.* A combined analysis of genetically correlated traits identifies 187 loci and a role for neurogenesis and myelination in intelligence. *Mol Psychiatry* **24**, 169-181 (2019).
50. Neumann, A. *et al.* Single Nucleotide Polymorphism Heritability of a General Psychopathology Factor in Children. *J Am Acad Child Adolesc Psychiatry* **55**, 1038-1045 e4 (2016).
51. de la Torre-Ubieta, L. *et al.* The Dynamic Landscape of Open Chromatin during Human Cortical Neurogenesis. *Cell* **172**, 289-304 e18 (2018).
52. McClard, C.K. *et al.* POU6f1 Mediates Neuropeptide-Dependent Plasticity in the Adult Brain. *J Neurosci* **38**, 1443-1461 (2018).
53. Hashizume, K., Yamanaka, M. & Ueda, S. POU3F2 participates in cognitive function and adult hippocampal neurogenesis via mammalian-characteristic amino acid repeats. *Genes Brain Behav* **17**, 118-125 (2018).
54. Ninkovic, J. *et al.* The BAF complex interacts with Pax6 in adult neural progenitors to establish a neurogenic cross-regulatory transcriptional network. *Cell Stem Cell* **13**, 403-18 (2013).
55. Nieto, M. *et al.* Expression of Cux-1 and Cux-2 in the subventricular zone and upper layers II-IV of the cerebral cortex. *J Comp Neurol* **479**, 168-80 (2004).
56. Gray, L.T. *et al.* Layer-specific chromatin accessibility landscapes reveal regulatory networks in adult mouse visual cortex. *Elife* **6**(2017).
57. Lek, M. *et al.* Analysis of protein-coding genetic variation in 60,706 humans. *Nature* **536**, 285-91 (2016).
58. Moretti, S. *et al.* Selectome update: quality control and computational improvements to a database of positive selection. *Nucleic Acids Res* **42**, D917-21 (2014).
59. Doan, R.N. *et al.* Mutations in Human Accelerated Regions Disrupt Cognition and Social Behavior. *Cell* **167**, 341-354 e12 (2016).
60. Davis, K.L. & Panksepp, J. *The emotional foundations of personality: A neurobiological and evolutionary approach*, (WW Norton & Company, 2018).
61. Maier, R.M., Visscher, P.M., Robinson, M.R. & Wray, N.R. Embracing polygenicity: a review of methods and tools for psychiatric genetics research. *Psychol Med* **48**, 1055-1067 (2018).
62. McGreevy, P.D. *et al.* Dog Behavior Co-Varies with Height, Bodyweight and Skull Shape. *PLoS ONE* **8**, e80529 (2013).
63. Wilson, B., Serpell, J., Herzog, H. & McGreevy, P. Prevailing Clusters of Canine Behavioural Traits in Historical US Demand for Dog Breeds (1926(-)2005). *Animals (Basel)* **8**(2018).
64. Puurunen, J. *et al.* Inadequate socialisation, inactivity, and urban living environment are associated with social fearfulness in pet dogs. *Sci Rep* **10**, 3527 (2020).
65. Adams, H.H. *et al.* Novel genetic loci underlying human intracranial volume identified through genome-wide association. *Nat Neurosci* **19**, 1569-1582 (2016).

66. Tyrrell, J. *et al.* Height, body mass index, and socioeconomic status: mendelian randomisation study in UK Biobank. *BMJ* **352**, i582 (2016).
67. Fang, L. *et al.* Comprehensive analyses of 723 transcriptomes enhance genetic and biological interpretations for complex traits in cattle. *Genome Res* **30**, 790-801 (2020).
68. Gao, M. *et al.* Psychiatric comorbidity among women with endometriosis: nationwide cohort study in Sweden. *Am J Obstet Gynecol* (2020).
69. Stahler, D.R., MacNulty, D.R., Wayne, R.K., vonHoldt, B. & Smith, D.W. The adaptive value of morphological, behavioural and life-history traits in reproductive female wolves. *J Anim Ecol* **82**, 222-34 (2013).
70. Borge, K.S., Tonnessen, R., Nodtvedt, A. & Indrebo, A. Litter size at birth in purebred dogs--a retrospective study of 224 breeds. *Theriogenology* **75**, 911-9 (2011).
71. Day, F.R. *et al.* Physical and neurobehavioral determinants of reproductive onset and success. *Nat Genet* **48**, 617-623 (2016).
72. Day, F.R. *et al.* Genomic analyses identify hundreds of variants associated with age at menarche and support a role for puberty timing in cancer risk. *Nat Genet* **49**, 834-841 (2017).
73. Hollis, B. *et al.* Genomic analysis of male puberty timing highlights shared genetic basis with hair colour and lifespan. *Nat Commun* **11**, 1536 (2020).
74. Kirby, E.D., Kuwahara, A.A., Messer, R.L. & Wyss-Coray, T. Adult hippocampal neural stem and progenitor cells regulate the neurogenic niche by secreting VEGF. *Proc Natl Acad Sci U S A* **112**, 4128-33 (2015).
75. Bryois, J. *et al.* Genetic identification of cell types underlying brain complex traits yields insights into the etiology of Parkinson's disease. *Nat Genet* (2020).
76. Pettersson, E., Larsson, H. & Lichtenstein, P. Common psychiatric disorders share the same genetic origin: a multivariate sibling study of the Swedish population. *Mol Psychiatry* **21**, 717-21 (2016).
77. Rosenstrom, T. *et al.* Joint factorial structure of psychopathology and personality. *Psychol Med* **49**, 2158-2167 (2019).
78. Witting, L. The natural selection of metabolism and mass selects allometric transitions from prokaryotes to mammals. *Theoretical population biology* **117**, 23-42 (2017).
79. Marshall, M. The hidden links between mental disorders. *Nature* **581**, 19-21 (2020).
80. Serpell, J. & Duffy, D. Dog Breeds and Their Behavior. in *Domestic Dog Cognition and Behavior* (ed. Horowitz, A.) 31-57 (Springer Berlin Heidelberg, 2014).
81. Purcell, S. *et al.* PLINK: A Tool Set for Whole-Genome Association and Population-Based Linkage Analyses. *American journal of human genetics* **81**, 559-575 (2007).
82. Price, A.L., Zaitlen, N.A., Reich, D. & Patterson, N. New approaches to population stratification in genome-wide association studies. *Nat Rev Genet* **11**, 459-463 (2010).
83. Kent, W.J. *et al.* The Human Genome Browser at UCSC. *Genome Research* **12**, 996-1006 (2002).
84. Hoepfner, M.P. *et al.* An Improved Canine Genome and a Comprehensive Catalogue of Coding Genes and Non-Coding Transcripts. *PLoS ONE* **9**, e91172 (2014).
85. Calhoun, V.D., Adali, T., Pearlson, G.D. & Pekar, J.J. A method for making group inferences from functional MRI data using independent component analysis. *Hum Brain Mapp* **14**, 140-51 (2001).

Table 1. Canine interbreed GWA top confidence findings with human GWA relevance implicated in this work

| Peak marker (CanFam3) | Dog behavioral, body size & lifespan GWA traits (number of present cohorts or refs. for published support)                                                                                                                                                                                                                | Peak P     | Candidate dog genes <sup>1</sup>                                 | Human GWA hits (n) | Behavior & personality | Psychiatric | alcohol & drug use | Cognitive   | Brain structure | socio-demographic | Height & related   | BMI & related | hair & external pigmentation | Cardio-vascular | Blood         | Reproductive | Noble other human GWA                                         | Other canine GWA phenotypes                           |
|-----------------------|---------------------------------------------------------------------------------------------------------------------------------------------------------------------------------------------------------------------------------------------------------------------------------------------------------------------------|------------|------------------------------------------------------------------|--------------------|------------------------|-------------|--------------------|-------------|-----------------|-------------------|--------------------|---------------|------------------------------|-----------------|---------------|--------------|---------------------------------------------------------------|-------------------------------------------------------|
| chr1:42030177         | Excitability (MacLean et al. 2019; Energy, DogFear) <sup>2</sup>                                                                                                                                                                                                                                                          | 2.39E-09   | <b>ESR1</b>                                                      | 127                | 3                      | 2(2)        | 2(2)               | 1(5)        | 1(1)            | 2(5)              | 8(23)              | 3(5)          | 5(12)                        | 5(12)           |               |              | Noble other human GWA                                         | Other canine GWA phenotypes                           |
| chr1:60068123         | Urnation (MacLean, NonsocialFear) <sup>2</sup>                                                                                                                                                                                                                                                                            | 1.4832E-08 | <b>TBC1D32</b> (& 1 "LOC#")                                      | 3                  |                        |             |                    |             |                 |                   |                    |               |                              |                 |               |              | Long legs, PMID: 3040804                                      |                                                       |
| chr1:62730770         | StrangerFear, DogFear, Urination, StrangerAggression (MacLean et al. 2019; DogAggression) <sup>2</sup>                                                                                                                                                                                                                    | 1.23E-09   | <b>TRDN</b> , <b>NKAN2</b>                                       | 12, 29             | 0, 1(1)                | 2(2)        | 2(2)               | 0, 2(1)     | 0, 2(2)         | 0, 1(1)           |                    | 1(1)          | 1(1)                         | 1(1)            | 0, 1(1)       | 0, 1(1)      | Focal epilepsy                                                |                                                       |
| chr1:931921668        | SeparationAnxiety, DogFear, Chasing <sup>3</sup> (MacLean et al. 2019; SeparationAnxiety) <sup>2</sup>                                                                                                                                                                                                                    | 3.41E-10   | <b>EGL1</b> , <b>JAK2</b>                                        | 43, 48             | 0, 1(1)                |             |                    |             |                 |                   | 0, 1(1)            | 3(4)          | 2(3)                         |                 | 10(37), 9(17) |              | Sleep (2), Alzheimer's d                                      |                                                       |
| chr3:91114590         | Excitability, Size, Lifespan <sup>1</sup> (Vayssie et al. 2011 and others; Size) <sup>2</sup>                                                                                                                                                                                                                             | 4.88E-16   | <b>LOCBL</b> , <b>SLIT2</b>                                      | 111                | 1(1), 0                | 1(1), 0     | 1(1), 0            | 5(11), 0    | 0, 1(1)         |                   | 12(62); 9(14); 0   | 3(8)          | 2(4)                         | 2(3)            |               |              | Alzheimer's disease                                           | RCL1: litter size, PMID: 31263560, tail curl, 2202279 |
| chr4:39404339         | Chasing <sup>2</sup>                                                                                                                                                                                                                                                                                                      | 8.69E-08   | <b>STC2</b>                                                      | 9                  |                        |             |                    |             | 1(1)            |                   |                    |               |                              |                 |               |              | SleepChrono (3), refract. Err.                                | LCORL: skull morphology, PMID: 28552356               |
| chr5:35635996         | Escaping, Chasing (MacLean et al. 2019; TouchSensitivity) <sup>2</sup>                                                                                                                                                                                                                                                    | 2.52E-06   | <b>SHISA6</b>                                                    | 19                 | 1(1)                   |             |                    |             |                 |                   | 1(1)               | 1(1)          |                              |                 |               |              | Parkinson's d., Alzheimer's d.                                | Skull morphology, PMID: 28552356                      |
| chr7:43842285         | Size (2), Lifespan                                                                                                                                                                                                                                                                                                        | 4.04E-13   | <b>SHISA6</b> , <b>SHAD2</b>                                     | 7                  |                        |             |                    |             |                 |                   | 1(1)               | 1(1)          |                              |                 |               |              | Refractive error (9), sleep (3)                               | Skull shape, PMID: 28552356                           |
| chr7:45745071         | OwnerAggression, Size, NonsocialFear, Chasing, Escaping                                                                                                                                                                                                                                                                   | 1.68E-14   | <b>UNC01478</b> , <b>SETBP1</b>                                  | 44                 |                        |             | 2(3)               | 2(1)        |                 |                   | 2(3)               | 3(6)          | 3(8)                         |                 |               |              | Alzheimer's disease, none                                     | (Under diversifying selection, PMID: 2723669)         |
| chr10:2453907         | TouchSensitivity (2), DogAggression (2), StrangerAggression, NonsocialFear, Excitability, Attachment, Urination, Size, Lifespan                                                                                                                                                                                           | 3.21E-11   | <b>LEIG3</b> , <b>ATP2B3</b> (& 3 "LOC# genes)                   | 4, 3               |                        |             |                    | 0, 3(1)     |                 |                   |                    |               |                              |                 |               |              |                                                               |                                                       |
| chr10:2453907         | Attach (3), Barking (2), Chasing (2), DogAggress (2), Escaping (3), Excitability (3), Lifespan (3), NonsocialFear (2), OwnerAggress (2), RivalryAggress (2), SeparationAnxiety (2), Size (3), StrangerAggress (2), TouchSensitivity (3), Urinat. (2), Trainabl. DogAggress, Excitability, Size, DogFear, TouchSensitivity | 2.59E-39   | <b>MRB3</b> , <b>HMG2</b>                                        | 73, 108            | 2(2), 1(2)             |             |                    | 0, 3(3)     | 12(49), 1(5)    |                   | 1(2); 1(1); 10(50) | 2(4)          |                              |                 |               |              | Snoring (5), Alzheimer's disease, sleep                       | MSRB3: litter size, PMID: 31263560                    |
| chr11:2690946         | DogAggress, Excitability, Size, DogFear, TouchSensitivity                                                                                                                                                                                                                                                                 | 1.42E-09   | <b>KUAA2028</b>                                                  | 12                 |                        |             |                    |             | 1(1)            |                   |                    |               |                              |                 |               |              |                                                               |                                                       |
| chr12:21400122        | Trainability (MacLean et al. 2019; Chasing) <sup>2</sup>                                                                                                                                                                                                                                                                  | 1.67E-08   | <b>LOC101927189</b> , <b>MLIP</b>                                | 15                 | 1(1)                   |             |                    |             |                 |                   | 1(1)               | 2(2)          |                              |                 |               |              |                                                               |                                                       |
| chr15:6822452         | StrangerAggression (MacLean et al. 2019; Attachment, DogAggression, DogFear, DogRivalry) <sup>2</sup>                                                                                                                                                                                                                     | 2.29E-06   | <b>ZFP102</b> , <b>AS1</b> , <b>ZFP102</b>                       | 99                 | 3(3)                   | 4(5)        | 1(1)               | 4(5)        |                 |                   | 1(3)               | 1(1)          |                              |                 |               |              | Hearing impairment, glaucoma                                  |                                                       |
| chr13:8391652         | Excitability (2), NonsocialFear (2), Size (2), DogAggression, SeparationAnxiety, Attachment, Lifespan                                                                                                                                                                                                                     | 3.09E-18   | <b>ANGPT1</b> , <b>RSP02</b>                                     | 31, 20             | 1(1), 0                |             |                    | 1(1), 0     |                 |                   | 0, 2(2)            | 1(1), 0       | 0                            | 4(4), 0         |               |              | Intraoc. press (glau), (17), refract. err., Macular thickness |                                                       |
| chr15:41221438        | Barking (2), DogFear (2), Excitability (3), OwnerAggress (3), RivalryAggress (2), Size (2), TouchSensitivity (2), Urinat. (3), Attach, DogAggress, Lifespan, NonsocialFear, SeparationAnxiety                                                                                                                             | 3.09E-19   | <b>IGF1</b>                                                      | 23                 |                        | 1(1)        |                    |             | 2(9)            |                   | 1(3)               | 3(3)          |                              | 1(1)            |               |              | Refractive error                                              |                                                       |
| chr18:2027961         | Barking (2), DogAggression (2), DogFear (3), NonsocialFear (3), OwnerAggression (3), SeparationAnxiety (2), Size (3), StrangerAggression (3), ChasingFear (3), TouchSensitivity (3), Trainability (2), Attach, Chasing, Excitability, Lifespan, Urinat. Escaping (2), OwnerAggression (2), Chasing, Escaping              | 7.67E-43   | <b>GNAT3</b> , <b>DD38</b> <sup>3</sup>                          | 1, 39              | 0, 1(1)                |             |                    | 0, 1(2)     |                 |                   | 0, 1(1)            | 0, 1(1)       |                              |                 |               |              | Hearing impairment, Hearing impairment                        |                                                       |
| chr20:2184876         | SeparationAnxiety, Urination                                                                                                                                                                                                                                                                                              | 2.67E-15   | <b>MIE</b> , <b>FOX1</b>                                         | 19, 128            | 0, 4(6)                | 0, 4(9)     | 0, 2(4)            | 1(1); 8(20) | 1(1); 2(2)      | 0, 4(4)           | 0, 1(4)            | 3(4)          | 2(2)                         | 1(1); 3(3)      | 4(5); 6(9)    |              | None, SleepChrono (5), oc. press (5), refract. err., microane |                                                       |
| chr20:3769601         | Chasing (MacLean et al. 2019; Energy, Trainability) <sup>2</sup>                                                                                                                                                                                                                                                          | 7.34E-08   | <b>POC1A</b>                                                     | 4                  |                        |             |                    |             |                 |                   | 3(3)               |               |                              |                 |               |              | SOFT syn., PMID: 22840363/4                                   |                                                       |
| chr23:8387680         | Urnation (MacLean et al. 2019; Urination, DogFear, SeparationAnxiety) <sup>2</sup>                                                                                                                                                                                                                                        | 2.68E-10   | <b>SON5A</b> , <b>SCN10A</b>                                     | 63, 60             |                        |             |                    | 1(1); 1(1)  |                 |                   |                    |               |                              | 11(62); 15(39)  |               |              |                                                               |                                                       |
| chr24:32707621        | NonsocialFear (2), RivalryAggression (2), SeparationAnxiety (2), Chasing, Energy, OwnerAggression, TouchSensitivity, Urination                                                                                                                                                                                            | 2.12E-10   | <b>EIF2S2</b> <sup>4</sup> , <b>ASIP</b> , <b>RALY</b>           | 10, 38             | 0, 1(1)                |             |                    | 0, 1(1)     |                 |                   | 0, 2(2)            | 0, 2(4)       | 7(7); 13(13)                 | 0, 1(1)         | 0, 1(1)       |              | Alzheimer's D., Myopia                                        | Gestation length, PMID: 31263560                      |
| chr34:18559537        | DogFear (1) <sup>5</sup> , DogAggression (1) <sup>5</sup> , Excitability, Escaping, Excitability, DogAggression                                                                                                                                                                                                           | 2.95E-09   | <b>IGF2BP2</b> , <b>TRA2B</b>                                    |                    | 2(2); 2(2)             |             |                    |             |                 |                   | 5(18); 5(13)       |               |                              |                 | 0, 1(4)       | 0, 2(2); 0   |                                                               |                                                       |
| chrX:102927995        | DogFear (2), SeparationAnxiety (2), Size (2), Barking, Chasing, Excitability, Lifespan, NonsocialFear, StrangerFear, TouchSensitivity                                                                                                                                                                                     | 8.98E-13   | <b>IGSF1</b> <sup>1</sup> (FIRRE, ARHGAP36) <sup>5</sup> , STK26 | 3, 1               | 1(1), 0                |             |                    |             |                 |                   |                    |               |                              |                 |               |              |                                                               |                                                       |
| chrX:104218823        | Size (Shoenebeck & Ostrander 2014; PMID 25062362; Size, MacLean et al. 2019; Energy) <sup>2</sup>                                                                                                                                                                                                                         | 5.92E-08   | <b>GPC4</b> (may be in LD with preceding)                        | none               |                        |             |                    |             |                 |                   |                    |               |                              |                 |               |              |                                                               |                                                       |

Dog genes with human protein coding orthologs were annotated for human GWA relevance using the NCBI RefSeq database (none had such evidence for longevity traits). References cited in main article text given as name and year, and others given as PubMed ID

<sup>1</sup>Bold denotes favored by known biology, and underlining denotes higher positional proximity. Only annotated HUGO HGNC protein coding genes were evaluated for human GWA relevance

<sup>2</sup>Same haplotype associated with different traits in different cohorts

<sup>3</sup>IGSF1 was shown to have the causative variant for size at this locus and is good candidate for behavioral traits (PMID: 28257443)

<sup>4</sup>EIF2S2 has two human GWA hits (BMI, skin pigmentation)

<sup>5</sup>FIRRE is a lncRNA. ARHGAP36 had no human GWA hits

**Table 2. Pathway & tissue enrichment of canine behavioral GWA**

|                                                        | This study |                     | Body-mass corrected <sup>3</sup> |                     |
|--------------------------------------------------------|------------|---------------------|----------------------------------|---------------------|
|                                                        | Rank       | Bonferroni <i>P</i> | Rank                             | Bonferroni <i>P</i> |
| Biol. Pathways (KEGG, hum) <sup>1</sup>                |            |                     |                                  |                     |
| <u>Axon guidance</u>                                   | 1          | <b>1.76E-02</b>     | 1                                | <b>6.69E-04</b>     |
| Biol. Pathways (gene ontology, GO) <sup>2</sup>        |            |                     |                                  |                     |
| Embryo development                                     | 1          | <b>4.32E-03</b>     | 184                              | 1.00E+00            |
| <u>Any term re:morphogenesis</u>                       | 1          | <b>4.32E-03</b>     | 1                                | <b>1.02E-06</b>     |
| Any term containing "epithelial"                       | 3          | 7.84E-02            | 37                               | 2.80E-01            |
| Any term containing "proliferation"                    | 3          | 7.84E-02            | 202                              | 1.00E+00            |
| Any term containing "growth"                           | 10         | 7.47E-01            | 50                               | <b>2.62E-02</b>     |
| Any term re:neuronal development                       | 54         | 1.00E+00            | 4                                | <b>2.40E-05</b>     |
| Annotation: keyword up (Swiss-Prot) <sup>2</sup>       |            |                     |                                  |                     |
| <u>Alternative splicing</u>                            | 1          | <b>4.23E-05</b>     | 1                                | <b>9.79E-36</b>     |
| <u>Disease mutation</u>                                | 2          | <b>4.05E-02</b>     | 5                                | <b>4.10E-04</b>     |
| Annotation: tissue up (Uniprot) <sup>2</sup>           |            |                     |                                  |                     |
| Brain                                                  | 1          | 9.97E-01            | 1                                | <b>1.12E-11</b>     |
| Tissue expression (hum. BioGPS enriched) <sup>1</sup>  |            |                     |                                  |                     |
| Uterus                                                 | 1          | <b>1.22E-04</b>     | 10                               | 2.03E-01            |
| Prefrontal Cortex                                      | 7          | 4.81E-01            | 1                                | <b>1.80E-04</b>     |
| Fetal Brain                                            | 54         | 1.00E+00            | 2                                | <b>4.96E-03</b>     |
| Brain region up (mouse Allen Brain Atlas) <sup>1</sup> |            |                     |                                  |                     |
| <u>molecular layer of Subiculum</u>                    | 1          | <b>1.19E-02</b>     | 17                               | <b>4.53E-03</b>     |
| <u>Subiculum</u>                                       | 2          | <b>2.69E-02</b>     | 7                                | <b>8.81E-04</b>     |
| nucleus of the stria terminalis (Mv)                   | 3          | <b>2.73E-02</b>     | 858                              | 6.77E-01            |
| <u>superficial stratum of Subiculum</u>                | 4          | <b>2.80E-02</b>     | 25                               | <b>1.33E-02</b>     |
| parastrial preoptic nucleus                            | 5          | <b>2.96E-02</b>     | 1233                             | 8.63E-01            |
| mantle zone of THyB-D                                  | 6          | <b>3.15E-02</b>     | 1479                             | 9.22E-01            |
| <u>mantle zone of Subiculum</u>                        | 7          | <b>3.36E-02</b>     | 27                               | <b>1.40E-02</b>     |
| intermediate stratum of the VAP                        | 8          | <b>3.60E-02</b>     | 734                              | 5.80E-01            |
| dorsal part of THyB                                    | 9          | <b>3.87E-02</b>     | 1678                             | 9.52E-01            |
| Ventromedial hypothalamic nucleus                      | 10         | <b>4.04E-02</b>     | 1209                             | 8.54E-01            |
| layer 5 of PaS                                         | 11         | <b>4.09E-02</b>     | 84                               | <b>6.57E-02</b>     |
| Ventromedial hypothalamic nuc. (C)                     | 12         | <b>4.19E-02</b>     | 613                              | 4.75E-01            |
| Uvula (IX)                                             | 13         | <b>4.58E-02</b>     | 1968                             | 9.87E-01            |
| Subiculum, dorsal part                                 | 33         | 9.10E-02            | 1                                | <b>9.05E-05</b>     |
| Subiculum, dorsal part, molecular layer                | 111        | 1.72E-01            | 2                                | <b>4.88E-04</b>     |
| Subiculum, dorsal part, stratum radiatum               | 100        | 1.67E-01            | 3                                | <b>5.06E-04</b>     |
| Striatum dorsal region                                 | 1435       | 8.77E-01            | 4                                | <b>6.07E-04</b>     |
| Caudoputamen                                           | 1752       | 9.73E-01            | 5                                | <b>7.59E-04</b>     |
| Field CA1                                              | 255        | 2.67E-01            | 6                                | <b>7.81E-04</b>     |
| striatum (corpus striatum)                             | 1055       | 7.00E-01            | 8                                | <b>9.09E-04</b>     |
| mantle zone of Striatum                                | 1283       | 7.82E-01            | 9                                | <b>1.01E-03</b>     |
| Anterior cingulate area, ventral part, 6b              | 475        | 3.74E-01            | 10                               | <b>1.01E-03</b>     |
| TF-KO gene expression changes <sup>1</sup>             |            |                     |                                  |                     |
| <u>LMX1B</u>                                           | 1          | <b>1.64E-03</b>     | 19                               | <b>1.94E-02</b>     |
| <u>MECP2</u>                                           | 2          | <b>2.72E-03</b>     | 1                                | <b>1.35E-04</b>     |

<sup>1</sup>Enrichr analysis, <sup>2</sup>DAVID analysis, <sup>3</sup>MacLean et al. 2019

Terms significant in both studies are italicized and underlined;  $P_{Bonf} < 0.05$  are in bold

**Table 3. Transcription factor binding site prediction**

| TF binding site        | This study |      |                | Body-mass corrected <sup>1</sup> |      |                |
|------------------------|------------|------|----------------|----------------------------------|------|----------------|
|                        | Rank       | Enr. | Bonf. <i>P</i> | Rank                             | Enr. | Bonf. <i>P</i> |
| <b>POU6F1</b>          | <b>1</b>   | 2.17 | 2.08E-15       | <b>2</b>                         | 2.02 | 8.66E-82       |
| <b><u>POU2F1/2</u></b> | <b>2</b>   | 2.03 | 1.98E-14       | <b>15</b>                        | 1.86 | 9.03E-70       |
| <b>MEF2A</b>           | <b>3</b>   | 1.96 | 7.90E-13       | <b>13</b>                        | 1.87 | 9.75E-75       |
| <b>PRX2</b>            | <b>4</b>   | 2.00 | 1.46E-12       | <b>10</b>                        | 1.92 | 5.98E-76       |
| <b>FOXA2</b>           | <b>5</b>   | 2.08 | 5.49E-12       | <b>4</b>                         | 2.04 | 2.79E-80       |
| <b>FOXL1</b>           | <b>6</b>   | 1.90 | 6.94E-12       | <b>12</b>                        | 1.85 | 2.82E-75       |
| FOXQ1                  | <b>7</b>   | 1.98 | 1.16E-11       | 28                               | 1.85 | 1.02E-62       |
| GATA1-6                | <b>8</b>   | 1.97 | 1.30E-11       | 43                               | 1.74 | 7.99E-48       |
| <b>LHX3</b>            | <b>9</b>   | 2.17 | 1.71E-11       | <b>3</b>                         | 2.15 | 2.26E-80       |
| <u>CUX1</u>            | <b>10</b>  | 1.68 | 1.81E-11       | 26                               | 1.60 | 6.77E-63       |
| <b>TBP*</b>            | <b>11</b>  | 1.77 | 3.51E-11       | <b>5</b>                         | 2.18 | 4.76E-79       |
| <b>CDC5L</b>           | <b>12</b>  | 1.93 | 9.18E-11       | <b>7</b>                         | 1.94 | 1.69E-78       |
| <b>POU3F2</b>          | <b>13</b>  | 1.67 | 1.98E-10       | <b>18</b>                        | 1.63 | 5.83E-66       |
| <b>CHX10</b>           | <b>14</b>  | 2.00 | 2.07E-10       | <b>8</b>                         | 2.00 | 2.41E-76       |
| <b>FOXI1</b>           | <b>15</b>  | 2.01 | 3.02E-10       | <b>16</b>                        | 1.96 | 5.71E-67       |
| NKX2-5                 | <b>16</b>  | 1.60 | 3.12E-10       | 54                               | 1.46 | 4.69E-42       |
| PBX1                   | <b>17</b>  | 1.67 | 2.06E-09       | 32                               | 1.62 | 5.17E-59       |
| GFI1                   | <b>18</b>  | 1.90 | 2.11E-09       | 46                               | 1.73 | 1.99E-45       |
| FOXD1                  | <b>19</b>  | 1.85 | 3.98E-09       | 38                               | 1.77 | 8.64E-55       |
| <b>FOXD3</b>           | <b>20</b>  | 2.11 | 6.42E-09       | <b>20</b>                        | 2.11 | 1.36E-65       |
| ALX1                   | 48         | 1.71 | 1.29E-06       | <b>1</b>                         | 1.90 | 6.10E-82       |

<sup>1</sup>MacLean et al. 2019. Full DAVID TF prediction datasets are provided in supplementary tables (note some TFs are official gene symbol here, but alias in suppl. tables; \*TATA and TBP refer to same factor but appear separately: ranked 11 and 44 in this study, and 25 and 5 in MacLean et al. 2019, respectively). TF binding sites significant in both studies are in bold. Genes mapped in canine GWAS's are italicized and underlined.

**Table 4. Human genetics relevance of canine behavioral GWA**

| Sources and representative traits                                      | This study |                 | Body-mass corrected <sup>1</sup> |                 |
|------------------------------------------------------------------------|------------|-----------------|----------------------------------|-----------------|
|                                                                        | Rank       | Bonf. <i>P</i>  | Rank                             | Bonf. <i>P</i>  |
| Human GWA catalog                                                      |            |                 |                                  |                 |
| Hip circumference adjusted for BMI*                                    | 1          | <b>1.89E-03</b> | 146                              | 3.01E-01        |
| Height*                                                                | 2          | <b>4.64E-03</b> | 108*                             | 2.49E-01        |
| <u>Systolic blood pressure</u>                                         | 3          | <b>6.96E-03</b> | 2                                | <b>5.45E-07</b> |
| <u>Menarche (age at onset)</u>                                         | 4          | <b>8.61E-03</b> | 18                               | <u>6.13E-02</u> |
| PR interval                                                            | 5          | <b>1.08E-02</b> | 169                              | 3.23E-01        |
| Birth weight*                                                          | 6          | <b>1.27E-02</b> | 105*                             | 2.44E-01        |
| Infant length*                                                         | 7          | <b>1.65E-02</b> | 804*                             | 9.20E-01        |
| Heart rate response to recovery post exercise                          | 8          | <b>3.03E-02</b> | 375                              | 7.03E-01        |
| <u>QRS duration</u>                                                    | 9          | <b>4.28E-02</b> | 13                               | <b>2.55E-02</b> |
| <u>Pulse pressure</u>                                                  | 10         | <b>4.31E-02</b> | 5                                | <b>3.19E-03</b> |
| Human GWA, UK Biobank                                                  |            |                 |                                  |                 |
| <u>Distance between home and job workplace 796 raw</u>                 | 1          | <b>1.45E-15</b> | 2                                | <b>3.14E-50</b> |
| <u>Pulse wave Arterial Stiffness index 21021 raw</u>                   | 2          | <b>4.75E-09</b> | 3                                | <b>2.93E-47</b> |
| <u>High light scatter reticulocyte percentage 30290 raw</u>            | 3          | <b>3.73E-08</b> | 1                                | <b>1.72E-57</b> |
| <u>Forced vital capacity 20151 raw</u>                                 | 4          | <b>2.76E-07</b> | 75                               | <b>1.02E-04</b> |
| <u>Standing height 50 raw</u>                                          | 6          | <b>1.38E-06</b> | 60                               | <b>1.08E-05</b> |
| <u>Forced expiratory volume in 1-second (best measure) 20150...</u>    | 10         | <b>2.75E-06</b> | 83                               | <b>1.96E-04</b> |
| <u>Whole body fat-free mass 23101 raw</u>                              | 15         | <b>1.27E-05</b> | 16                               | <b>7.34E-14</b> |
| <u>Monocyte count 30130 raw</u>                                        | 17         | <b>2.55E-05</b> | 7                                | <b>4.07E-23</b> |
| <u>Weight 23098 raw</u>                                                | 19         | <b>3.30E-05</b> | 41                               | <b>1.36E-07</b> |
| <u>Longest period of unenthusiasm/disinterest 5375 raw</u>             | 23         | <b>3.65E-05</b> | 10                               | <b>9.56E-19</b> |
| <u>Freq...needing morning drink of alcohol after heavy drinking...</u> | 26         | <b>6.29E-05</b> | 6                                | <b>1.46E-25</b> |
| <u>Basal metabolic rate 23105 raw</u>                                  | 29         | <b>6.72E-05</b> | 18                               | <b>8.50E-13</b> |
| <u>Inverse distance to the nearest major road 24012 raw</u>            | 34         | <b>1.58E-04</b> | 11                               | <b>1.76E-18</b> |
| <u>Hip circumference 49 raw</u>                                        | 35         | <b>1.61E-04</b> | 54                               | <b>4.55E-06</b> |
| <u>Birth weight 20022 raw</u>                                          | 42         | <b>5.25E-04</b> | 163                              | <b>2.80E-02</b> |
| <u>Lymphocyte count 30120 raw</u>                                      | 45         | <b>5.72E-04</b> | 4                                | <b>3.83E-41</b> |
| <u>Duration to first press of snap-button in each round 404 raw</u>    | 51         | <b>1.19E-03</b> | 12                               | <b>1.88E-18</b> |
| <u>Longest period of depression 4609 raw</u>                           | 52         | <b>1.48E-03</b> | 29                               | <b>3.82E-09</b> |
| <u>Peak expiratory flow 3064 raw</u>                                   | 54         | <b>1.92E-03</b> | 119                              | <b>2.91E-03</b> |
| <u>Red blood cell count 30010 raw</u>                                  | 58         | <b>5.60E-03</b> | 99                               | <b>9.32E-04</b> |
| <u>Home large urban area scotland 20118 11</u>                         | 61         | <b>8.40E-03</b> | 138                              | <b>8.88E-03</b> |
| <u>Whole body fat mass 23100 raw</u>                                   | 62         | <b>9.76E-03</b> | 43                               | <b>4.26E-07</b> |
| <u>Average total household income before tax 738</u>                   | 63         | <b>1.32E-02</b> | 271                              | 2.20E-01        |
| <u>Age first had sexual intercourse 2139 raw</u>                       | 64         | <b>1.35E-02</b> | 39                               | <b>1.31E-07</b> |
| <u>Age cataract diagnosed 4700 raw</u>                                 | 68         | <b>2.23E-02</b> | 193                              | <b>5.55E-02</b> |
| <u>North co-ordinate of birthplace in UK 129 raw</u>                   | 71         | <b>3.16E-02</b> | 81                               | <b>1.73E-04</b> |
| <u>Skin colour 1717</u>                                                | 72         | <b>3.42E-02</b> | 162                              | <b>2.70E-02</b> |
| <u>Body mass index (BMI) 23104 raw</u>                                 | 73         | <b>4.24E-02</b> | 52                               | <b>3.55E-06</b> |
| <u>Birth weight of first child 2744</u>                                | 75         | <b>4.29E-02</b> | 342                              | 3.84E-01        |
| <u>Malignant melanoma of skin C3 MELANOMA SKIN</u>                     | 76         | <b>4.31E-02</b> | 216                              | <b>8.43E-02</b> |
| <u>Right intra-ocular pressure corneal-compensated 5254 raw</u>        | 77         | <b>4.54E-02</b> | 72                               | <b>6.98E-05</b> |
| <u>QRS duration during ECG 12340 raw</u>                               | 78         | <b>4.90E-02</b> | 194                              | <b>5.68E-02</b> |
| <u>Longest period spent worried or anxious 20420 raw</u>               | 176        | 3.73E-01        | 35                               | <b>1.31E-08</b> |
| <u>Worrier/anxious feelings 1980</u>                                   | 271        | 9.62E-01        | 70                               | <b>4.80E-05</b> |
| <u>Neuroticism score 20127 raw</u>                                     | 289        | 1.00E+00        | 69                               | <b>3.65E-05</b> |
| <u>Never smoked 20116 0</u>                                            | 293        | 1.00E+00        | 127                              | <b>5.29E-03</b> |
| <u>Alcohol intake frequency 1558</u>                                   | 290        | 1.00E+00        | 157                              | <b>2.25E-02</b> |
| Genotype-phenotype (dbGAP)                                             |            |                 |                                  |                 |
| <u>Body Height</u>                                                     | 1          | <b>2.61E-03</b> | 10                               | <b>5.63E-08</b> |
| <u>Heart Function Tests</u>                                            | 2          | <b>1.15E-02</b> | 36                               | <b>1.23E-03</b> |
| Body Mass Index                                                        | 5          | 1.76E-01        | 1                                | <b>1.13E-24</b> |
| Hip                                                                    | 4          | <u>6.92E-02</u> | 7                                | <b>3.65E-08</b> |
| Echocardiography                                                       | 6          | 2.11E-01        | 8                                | <b>3.86E-08</b> |
| Body Weight                                                            | 7          | 3.14E-01        | 5                                | <b>2.85E-11</b> |

<sup>1</sup>MacLean et al. 2019. Enrichment analysis performed with Inrichr. Traits significant in both studies are italicized and underlined, and  $P_{Bonf} < 0.05$  are in bold and those trending underlined. All significant GWA catalog traits for this study's geneset were included here. For UK Biobank, a subset were selected as representative. The full analysis results are provided as supplementary tables.

**Table 5. Adaptive evolution and genomic demographics**

|                                                                        | Dog behavior GWA,<br>this study, n=108 |                                    | Mass-corrected dog<br>GWA <sup>2</sup> , n=715 |                                    | All genes, both<br>studies, n=804 |                                    |
|------------------------------------------------------------------------|----------------------------------------|------------------------------------|------------------------------------------------|------------------------------------|-----------------------------------|------------------------------------|
|                                                                        | Observed /<br>expected                 | under <i>P</i> or<br>over <i>Q</i> | Observed /<br>expected                         | under <i>P</i> or<br>over <i>Q</i> | Observed /<br>expected            | under <i>P</i> or<br>over <i>Q</i> |
| Genesets compiled from the literature in this study <sup>1</sup>       |                                        |                                    |                                                |                                    |                                   |                                    |
| Positive selection, dog breeds sampled in North Am. & Europe, n=1842   | 1.88                                   | <b>4.57E-04</b>                    | 1.35                                           | <b>1.00E-04</b>                    | 1.38                              | <b>7.40E-06</b>                    |
| Positive selection, 15 Chinese indigenous dog breeds, n=963            | 1.11                                   | 4.20E-01                           | 1.77                                           | <b>1.87E-08</b>                    | 1.64                              | <b>4.01E-07</b>                    |
| Positive selection in at least two of cattle, goat, pig & sheep, n=666 | 1.61                                   | 1.07E-01                           | 1.27                                           | 5.34E-02                           | 1.3                               | 2.88E-02                           |
| Positive selection, human, n=1412                                      | 1.27                                   | 2.03E-01                           | 1.38                                           | <b>3.03E-04</b>                    | 1.36                              | <b>2.32E-04</b>                    |
| Loss of function intolerant, human, n=3154                             | 1.28                                   | 6.02E-02                           | 1.36                                           | <b>2.15E-08</b>                    | 1.34                              | <b>2.42E-08</b>                    |
| Human accelerated divergence regions, n=1623                           | 2.64                                   | <b>1.76E-08</b>                    | 1.85                                           | <b>2.49E-16</b>                    | 1.93                              | <b>2.45E-21</b>                    |
| Protein-coding positive selection, vertebrates, n=550                  | 0.433                                  | 1.54E-01                           | 0.85                                           | 2.22E-01                           | 0.785                             | 1.05E-01                           |
| Differential brain gene expression in 3 wild v. domest. mamm., n=121   | 1.02                                   | 6.41E-01                           | 1.34                                           | 2.30E-01                           | 1.32                              | 2.24E-01                           |
| Disease associated genes (ClinVar), n=3047                             | 1.17                                   | 1.85E-01                           | 0.87                                           | 2.82E-02                           | 0.89                              | 3.52E-02                           |
| Haploinsufficient disease genes (ClinGen), n=294                       | 3.65                                   | <b>8.14E-04</b>                    | 1.04                                           | 4.69E-01                           | 1.31                              | 1.09E-01                           |
| Nearest gene to GWAS peaks (MacArthur Lab), n=6288                     | 0.97                                   | 4.02E-01                           | 1.03                                           | 2.21E-01                           | 1.01                              | 3.99E-01                           |
| Single-trait pan-GWA meta-analysis (Watanabe et al.), n=1968           | 0.48                                   | 1.06E-02                           | 0.62                                           | <b>1.97E-06</b>                    | 0.59                              | <b>5.31E-08</b>                    |
| Top pleiotropic pan-GWA meta-analysis (Watanabe et al.), n=1968        | 1.27                                   | 1.43E-01                           | 1.10                                           | 1.40E-01                           | 1.10                              | 1.23E-01                           |

Hypergeometric *P* and *Q* are lower and upper cumulative distribution functions. Bold surpass Bonferroni significance for 26 tests,  $1.92 \times 10^{-03}$ ; italicized surpass unadjusted threshold of 0.05.

<sup>1</sup>Gene lists and references provided in Supplementary Tables S39/40.

<sup>2</sup>MacLean et al. 2019.

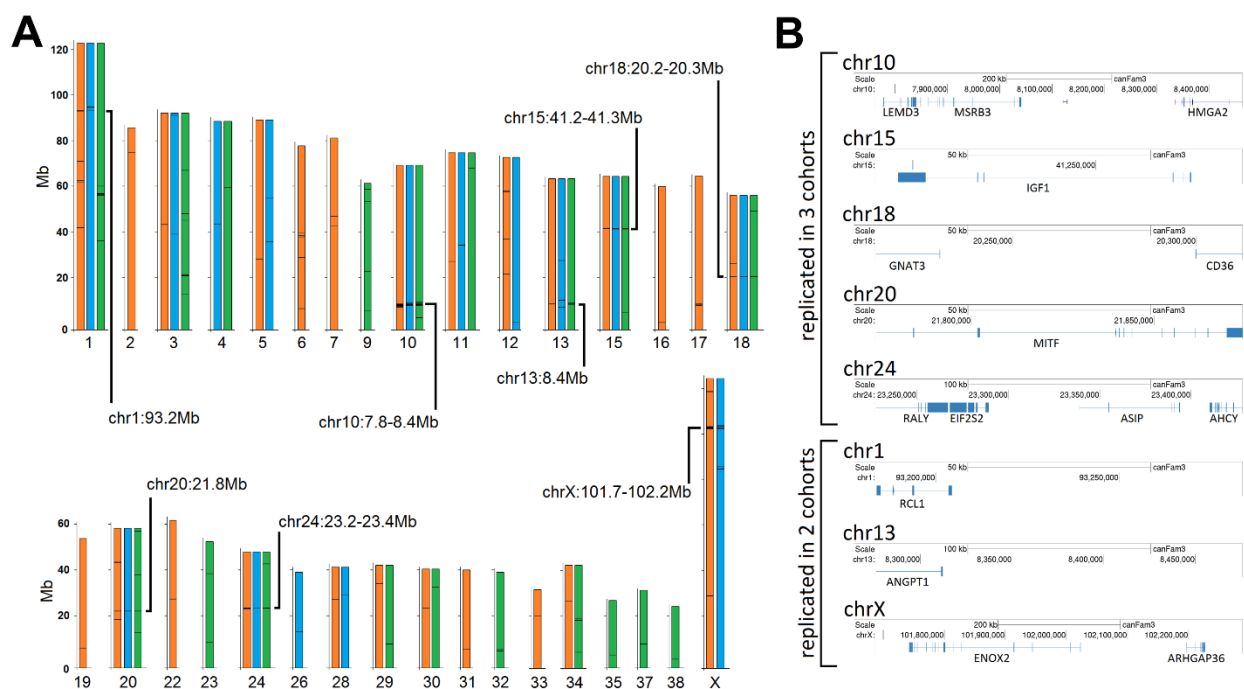

Fig. 1

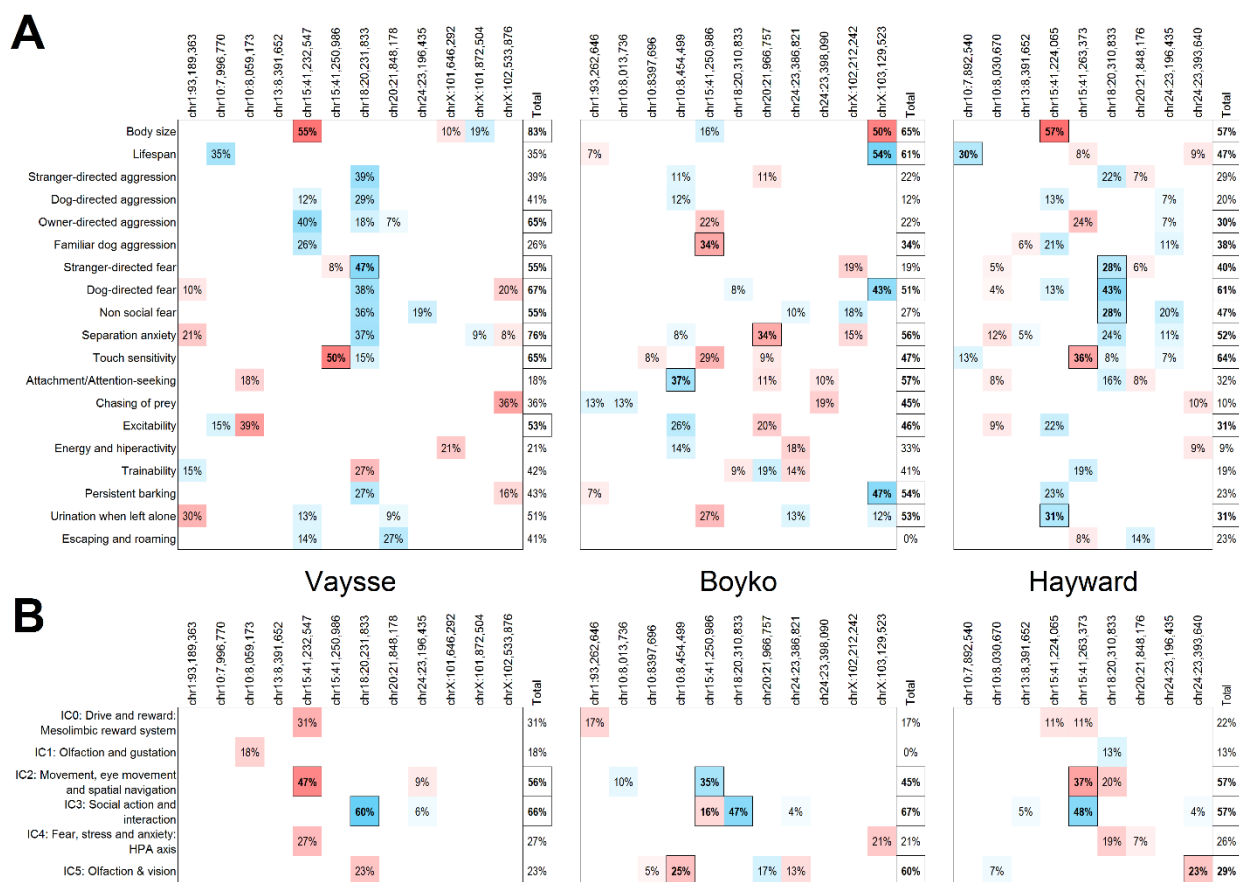

Fig. 2

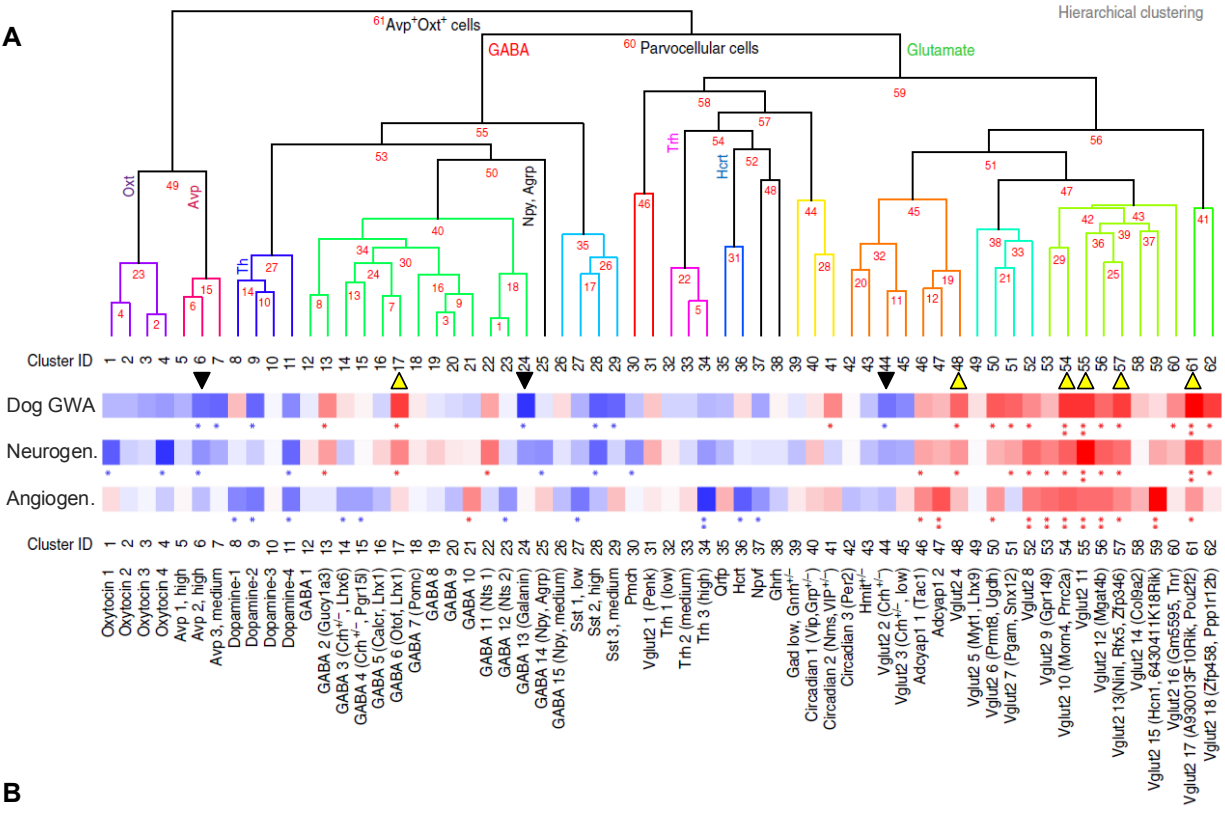

**B**

| Mouse Hypothalamus scRNA-seq<br>Neuron Cluster<br>(of 62, including 15 GABA<br>& 18 Glutamate) | Neurot., depress. &<br>wellbeing (N 660) <sup>2</sup> |                     | Educational attain.<br>(N 1286) <sup>3</sup> |                     | Tobacco & alcohol use<br>(N 1117) <sup>4</sup> |                     | Autism Spect. Dis.<br>(N 1119) <sup>5</sup> |                     | Brain structure<br>(N 937) <sup>6</sup> |                     | Dog behavior GWAS's<br>(N 804) <sup>1</sup> |                      |
|------------------------------------------------------------------------------------------------|-------------------------------------------------------|---------------------|----------------------------------------------|---------------------|------------------------------------------------|---------------------|---------------------------------------------|---------------------|-----------------------------------------|---------------------|---------------------------------------------|----------------------|
|                                                                                                | observed /<br>expected                                | under Por<br>over Q | observed /<br>expected                       | under Por<br>over Q | observed /<br>expected                         | under Por<br>over Q | observed /<br>expected                      | under Por<br>over Q | observed /<br>expected                  | under Por<br>over Q | observed /<br>expected                      | under P or<br>over Q |
| Dog behavior GWAS's (N 804) <sup>1</sup>                                                       | 1.41                                                  | 5.10E-03            | 1.58                                         | 1.90E-08            | 1.53                                           | 3.88E-06            | 1.48                                        | 2.17E-05            | 1.59                                    | 4.23E-06            | NA                                          | NA                   |
| Down Clust. 6, <i>Avp</i> (N 2k)                                                               | 0.86                                                  | 5.77E-02            | 1.13                                         | 2.02E-02            | 1.05                                           | 2.48E-01            | 0.91                                        | 9.87E-02            | 1.69                                    | 1.08E-07            | 0.71                                        | 1.05E-04             |
| Down Clust. 24, <i>GABA</i> ( <i>Gall</i> ) (N 2k)                                             | 0.87                                                  | 7.22E-02            | 1.02                                         | 4.15E-01            | 0.94                                           | 2.15E-01            | 0.85                                        | 1.18E-02            | 1.64                                    | 7.16E-07            | 0.63                                        | 7.24E-07             |
| Down Clust. 44, <i>Glut</i> ( <i>Crh</i> ) (N 2k)                                              | 0.74                                                  | 1.47E-03            | 0.95                                         | 2.23E-01            | 1.07                                           | 1.74E-01            | 0.78                                        | 4.09E-04            | 1.78                                    | 3.62E-09            | 0.72                                        | 1.61E-04             |
| Up Clust. 17, <i>GABA</i> (N 2k)                                                               | 1.04                                                  | 3.31E-01            | 1.67                                         | 2.88E-24            | 1.63                                           | 4.57E-19            | 1.33                                        | 7.17E-07            | 2.20                                    | 2.05E-18            | 1.22                                        | 4.55E-03             |
| Up Clust. 48, <i>Glut</i> (N 2k)                                                               | 0.93                                                  | 7.22E-02            | 1.67                                         | 1.38E-24            | 1.62                                           | 1.80E-18            | 1.16                                        | 8.79E-03            | 2.34                                    | 5.49E-22            | 1.16                                        | 2.66E-02             |
| Up Clust. 54, <i>Glut</i> (N 2k)                                                               | 1.03                                                  | 3.71E-01            | 1.65                                         | 2.57E-23            | 1.76                                           | 1.44E-26            | 1.25                                        | 1.13E-04            | 2.32                                    | 1.59E-21            | 1.24                                        | 1.90E-03             |
| Up Clust. 55, <i>Glut</i> (N 2k)                                                               | 1.16                                                  | 4.18E-02            | 1.88                                         | 1.84E-39            | 1.83                                           | 5.91E-31            | 1.34                                        | 4.78E-07            | 2.44                                    | 7.51E-25            | 1.24                                        | 1.90E-03             |
| Up Clust. 57, <i>Glut</i> (N 2k)                                                               | 1.07                                                  | 2.22E-01            | 1.68                                         | 6.55E-25            | 1.62                                           | 1.80E-18            | 1.25                                        | 1.55E-04            | 2.31                                    | 4.56E-21            | 1.22                                        | 3.43E-03             |
| Up Clust. 61, <i>Glut</i> (N 2k)                                                               | 1.31                                                  | 4.82E-04            | 1.96                                         | 3.70E-46            | 1.80                                           | 1.01E-28            | 1.37                                        | 3.72E-08            | 2.37                                    | 6.34E-23            | 1.32                                        | 6.14E-05             |

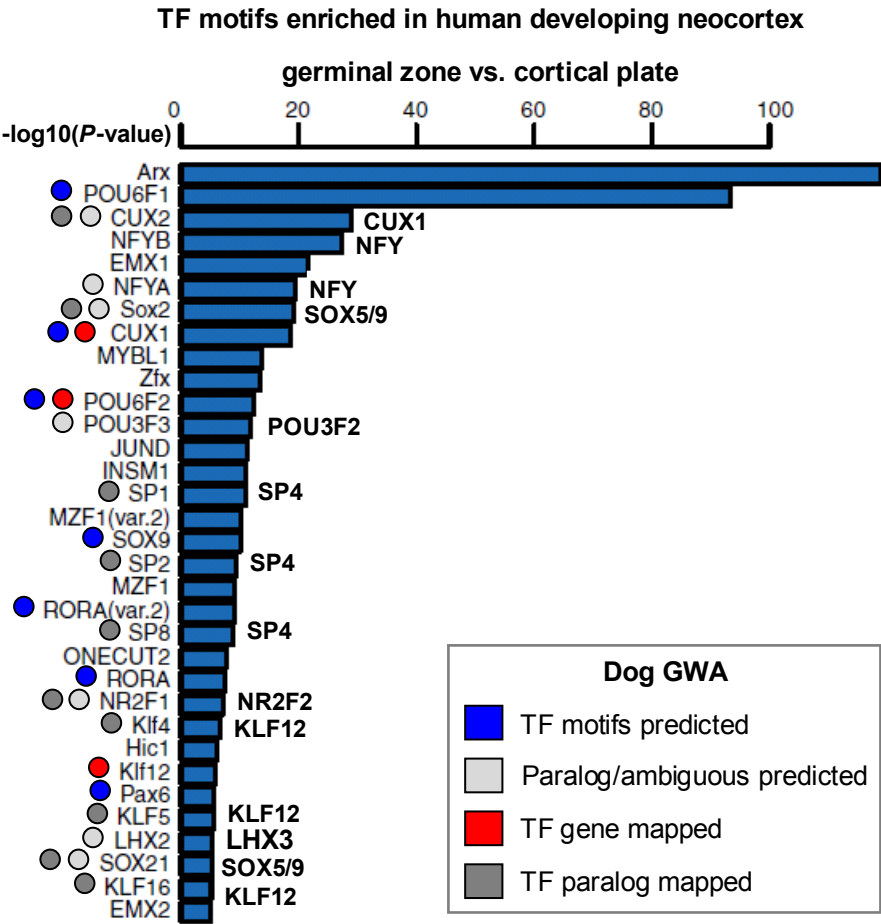

Source: http://biorxiv.org/content/10.1101/2020.07.19.211078v1.full.pdf
